1 **Title and Author Information**

2

3 *Title.*—What is the Best Available Science?: Conservation Status of Two California Desert  
4 Vertebrates

5

6 *Author information.*—**Adam G. Clause,\* Christopher J. Norment, Laura Cunningham,**  
7 **Kevin Emmerich, Nicholas G. Buckmaster, Erin Nordin, Robert W. Hansen**

8

9 **A.G. Clause**

10 Warnell School of Forestry and Natural Resources, University of Georgia, Athens 30602

11

12 **C.J. Norment**

13 Department of Environmental Science and Ecology, The College at Brockport, State University  
14 of New York, Brockport 14420

15

16 **L. Cunningham**

17 Western Watersheds Project, PO Box 70, Beatty, Nevada 89003

18

19 **K. Emmerich**

20 Basin and Range Watch, PO Box 70, Beatty, Nevada 89003

21

22 **N.G. Buckmaster**

23 California Department of Fish and Wildlife, 787 N Main Street #220, Bishop, California 93514

24

25 **E. Nordin**

26 U.S. Fish and Wildlife Service, 351 Pacu Lane, Bishop, California 93514

27

28 **R.W. Hansen**

29 16333 Deer Path Lane, Clovis, California 93619

30

31 \*Corresponding author: [adamclause@gmail.com](mailto:adamclause@gmail.com)

32  
33  
34  
35  
36  
37  
38  
39  
40  
41  
42  
43  
44  
45  
46  
47  
48  
49  
50  
51  
52  
53  
54

## Abstract

Scientific progress depends on evidence-based research, and reliance on accurate scholarship is essential when making management decisions for imperiled species. However, erroneous claims are sometimes perpetuated in the scientific and technical literature, which can complicate policy and regulatory judgments. The literature associated with two enigmatic California desert vertebrates, the Panamint alligator lizard *Elgaria panamintina* and the Inyo Mountains salamander *Batrachoseps campi*, exemplifies this problem. We produced a comprehensive threat analysis and status assessment for these species, which are both under review for possible listing under the US Endangered Species Act (ESA). Despite uncertainties and limited data, we find that many sources contain factual errors about the status of these two species, particularly the original petition that advocated for ESA listing. Although localized declines may have gone undetected, no evidence exists of population declines, population extirpation, or population-scale habitat conversion for *E. panamintina*. However, there is evidence of recent flash flood damage to some occupied *B. campi* habitat, which has possibly led to population declines at those localities. Contrary to inaccurate statements by some authors, all known populations of both species occur exclusively on federal lands, and numerous populations have likely benefited from recent federal management targeted at reducing known threats. Of the 12 threats that we identified for one or both species, only three currently appear to be serious: water diversions, climate change, and flash floods. The remaining threats are neither widespread nor severe, despite numerous contrary yet poorly supported statements in the literature. We thus evaluate the contemporary conservation status of both species as relatively secure, although *B. campi* is more at-risk compared to *E. panamintina*. This conclusion is independently supported by a recent review. Nonetheless, ongoing stewardship of these species in a multi-use context by federal agencies

55 remains vital, and we identify several priority management actions and research needs for both  
56 species. We also recommend updated determinations on the IUCN Red List, and the Species of  
57 Conservation Concern list of the Inyo National Forest. To maximize the quality and effectiveness  
58 of conservation planning, we urge government agencies, non-governmental organizations, and  
59 individual scientists to maintain high standards of scholarship and decision-making.

60

61

62

63

64

65

66

67

68

69

70

71

72

73

74

75

76

77

78  
79  
80  
81  
82  
83  
84  
85  
86  
87  
88  
89  
90  
91  
92  
93  
94  
95  
96  
97  
98  
99  
100

## Introduction

Science is an incremental, evidence-based process whereby new research builds on earlier work. A common metaphor for this process is that individual works are like bricks, which are progressively assembled into structures that represent bodies of theory and descriptive knowledge (Forscher 1963; Courchamp and Bradshaw 2017). Building good “bricks” and “structures” depends on proper interpretation of prior research, comprehensive review of relevant sources, synthetic data analysis, and placement of new findings in appropriate context. Failure to adhere to these scholarly principles can misdirect scientific progress. Such issues have motivated several recent reminders of author best-practices (Perry 2016; Anonymous 2017), and the life sciences have not escaped these problems (Grieneisen and Zhang 2012). For example, narratives on the impact of invasive species are sometimes affected by inaccurate or misinterpreted citations (Stromberg et al. 2009; Ricciardi and Ryan 2017), perspectives on predator-mediated trophic cascades may be overly simplistic and even misleading (Kauffman et al. 2010; Marshall et al. 2013; Marris 2014), and poorly documented claims of both species rediscovery and species extinction/extirpation are regularly falsified (Ladle et al. 2009; Roberts et al. 2010; Ladle et al. 2011; Scheffers et al. 2011; Caviedes-Solis et al. 2015; Clause et al. 2018).

Reliance on quality scholarship is especially important when making conservation decisions for imperiled species. It ensures the best possible justification for the decision (Sutherland et al. 2004), and can increase the legitimacy of the decision among stakeholders (Pullin and Knight 2009). This precept is codified in the decision-making process associated with what is, arguably, the most far-reaching piece of environmental legislation in the United States: the US Endangered Species Act (ESA 1973, as amended). Administered by the United States Fish and Wildlife Service (USFWS) and the National Marine Fisheries Service, the ESA requires

101 both agencies to consider only the “best scientific and commercial data available” when making  
102 species-listing decisions (ESA 1973). However, the degree to which these agencies follow this  
103 standard is variable, due to numerous internal and external challenges (Lowell and Kelly 2016;  
104 Murphy and Weiland 2016). Problems attributed to poorly supported ESA listing petitions have  
105 also motivated recent regulatory changes to the process for proposing new additions to the Lists  
106 of Endangered and Threatened Wildlife and Plants (USFWS et al. 2016).

107 In 2012, the US nonprofit Center for Biological Diversity submitted a multi-species  
108 petition to the USFWS advocating ESA listing for 53 amphibian and reptile taxa (Adkins Giese  
109 et al. 2012). As required under the ESA, the USFWS subsequently released 90-day findings for  
110 all 53 taxa, which represented the agency’s initial decision on whether the petitioner offered  
111 substantial information in support of listing (USFWS 2015a, 2015b, 2015c; USFWS 2016a,  
112 2016b, 2016c). These 90-day findings concluded that, for 17 of the 53 species, Adkins Giese et  
113 al. (2012) did not present substantial information that the petitioned action (ESA listing) was  
114 warranted. The remaining 36 taxa were advanced to the status review phase for more detailed  
115 examination and public comment. Two of the taxa currently undergoing status review are the  
116 Panamint alligator lizard *Elgaria panamintina*, and the Inyo Mountains salamander  
117 *Batrachoseps campi* (Figure 1; USFWS 2015c).

118 These two species are endemic to eastern California, USA, where they are roughly  
119 codistributed in the arid mountain ranges of the western Great Basin and northern Mojave deserts  
120 (Banta et al. 1996; Jockusch 2001). These mountains are among the most rugged and  
121 inaccessible landscapes in California. They support few paved roads, and their slopes are often  
122 incised by steep canyons with multiple waterfalls (Figure 2, Figure 3). Within the mountains, *E.*  
123 *panamintina* and *B. campi* inhabit similar environs and sometimes occur in syntopy. Occupied

124 microhabitats for both species include mesic riparian zones fed by perennial springs or creeks,  
125 and more arid talus slopes or limestone rock crevices far from standing water (Macey and  
126 Papenfuss 1991a, 1991b). Due to their secretive behavior and remote habitats, little is known of  
127 these species' biology and minimal literature has accrued since their discovery in 1954 and 1973,  
128 respectively (Stebbins 1958; Marlow et al. 1979). Nonetheless, both species are widely  
129 considered imperiled to some degree. The IUCN Red List of Threatened Species categorizes *E.*  
130 *panamintina* as Vulnerable (Hammerson 2007) and *B. campi* as Endangered (Hammerson  
131 2004a). They have been designated as Species of Special Concern by the California Department  
132 of Fish and Wildlife (CDFW) for over 20 years (Jennings and Hayes 1994), and retained that  
133 status following a recent review (Thomson et al. 2016). However, some information that was  
134 incorporated into these determinations is inaccurate. Furthermore, many erroneous claims exist  
135 in the literature for both species, and substantial field survey data have accumulated since these  
136 listings were released. Identifying these errors, and accounting for new data, are especially  
137 important given the major regulatory decision that is pending for both species.

138         Here, we analyze the conservation status of *E. panamintina* and *B. campi*, using a dataset  
139 collated from white and gray literature, museum records, and contemporary field survey data.  
140 Our objective is to build a comprehensive threat analysis, generate a status assessment, and  
141 contrast our findings against outmoded sources and factual inaccuracies in the literature. We  
142 conclude by presenting management recommendations and research needs for both *E.*  
143 *panamintina* and *B. campi*, and highlight the necessity of ensuring scholarly standards in both  
144 technical and peer-reviewed literature.

145

146

147

## Methods

148

149

150

151

152

153

154

155

156

157

158

159

160

161

162

163

164

165

166

167

168

169

We reviewed the available literature on both *E. panamintina* and *B. campi* using their common and scientific names (and all synonyms) as search terms in the ISI Web of Science and Zoological Record databases. We also acquired copies of relevant uncirculated gray literature, in the form of reports prepared for resource management agencies. In addition, we included published sources such as species accounts from books (including field guides), the IUCN Red List, and NatureServe within our concept of relevant literature despite their often less scholarly nature. Although these reports and other works are usually held in lower regard than peer-reviewed publications, they contain a large proportion of available technical knowledge relevant to our study, and many were cited in the Adkins Giese et al. (2012) listing petition for both species. As such, we consider it imperative to consider these sources in our analysis.

Concurrently with our literature review, we queried the VertNet online portal to create a database of museum records, supplemented with data obtained directly from relevant museums (California Academy of Sciences, CAS; Museum of Vertebrate Zoology, MVZ; Florida Museum of Natural History, UF-Herpetology; and Natural History Museum of Los Angeles County, LACM). To georeference literature/specimen locality data, evaluate land ownership, and quantify the presence of roads, we used digital US Geological Survey 7.5-min 1:24,000 topographical maps published in 2012 and 2015, corroborated with the California Atlas & Gazetteer™ (DeLorme 2015).

We complemented this literature review with field survey data that we collected in 2000–2001 and 2009–2018. Our survey methodology primarily consisted of visual encounter surveys completed on foot, but we also road cruised occasionally. We surveyed each locality 1–10+ times, with a total survey effort of 3–100+ person-hours per locality. When on foot, we surveyed

170 riparian vegetation and talus habitats in an attempt to detect surface-active *E. panamintina* or *B.*  
171 *campi*, often supplemented by flip-and-replacement of cover objects such as rocks and logs.  
172 During surveys we recorded all threats to either species, which we define as any anthropogenic  
173 or non-anthropogenic action or condition known or reasonably likely to negatively affect  
174 individuals or their habitat. Our definition of a locality corresponds to individual drainage basins  
175 or sub-basins, and every locality that we recognize is at least 1 airline km distant from the nearest  
176 portion of any other. At localities represented by point-source springs, we surveyed the length of  
177 the available habitat whenever possible. At localities represented by creeks or streams,  
178 impassable waterfalls or other barriers often prevented us from viewing habitat in upstream  
179 reaches. However, we consider our survey coverage of these long, linear localities sufficient to  
180 identify nearly all possible threats. Due to major access constraints higher in the remote, rugged  
181 reaches of many canyons, impacts from humans and their attendant infrastructure/animals are  
182 usually most intense near the canyon mouth (Figure 2). In keeping with these landscape-use  
183 patterns, we always covered the lower reaches of the creeks and canyons in our surveys. For all  
184 new localities and elevation records for *E. panamintina* and *B. campi* discovered during our  
185 surveys, we deposited vouchers at the LACM. These vouchers consisted of at least one of the  
186 following: whole-body specimen(s), genetic tissue sample(s), and digital photo(s).

187         After compiling this combined dataset, we first reviewed existing knowledge of the  
188 distribution and relevant natural history of each species, to provide appropriate context for  
189 evaluating threats. Next, we assessed all threats to these species that we identified during our  
190 field surveys or that were mentioned by Adkins Giese et al. (2012). We categorized these threats  
191 using the 5-factor analysis used by the USFWS for listing decisions. These are: (Factor A) the  
192 present or threatened destruction, modification, or curtailment of the species' habitat or range;



193 (Factor B) overutilization for commercial, recreational, scientific, or educational purposes;  
194 (Factor C) disease or predation; (Factor D) the inadequacy of existing regulatory mechanisms;  
195 and (Factor E) other natural or manmade factors affecting the species' continued existence (ESA  
196 1973). Because of the broad nature of Factors A and E, we further divided them into seven and  
197 two sub-factors, respectively. In total, we thus identified 12 discrete threats to one or both focal  
198 species.

199 For each of these threats, we ranked its severity on a scale from 0 to 3, with definitions as  
200 follows: 0 = not currently affecting known localities, 1 = currently affecting <20% of known  
201 localities, 2 = currently affecting 20–50% of known localities, 3 = currently affecting >50% of  
202 known localities. We consider the divisions of this ranking scale fine enough to be informative,  
203 yet coarse enough to be resilient to changes in threat rankings following the acquisition of new  
204 survey data.

205

206

## Results and Discussion

207 We surveyed 73% (24/33) of the documented localities for *E. panamintina*, and 81%  
208 (17/21) of the documented localities for *B. campi*. These were generally the most logistically  
209 accessible localities. We also surveyed 16 additional localities with appropriate riparian/talus  
210 habitat that is suspected, but not known, to support one or both species (Figure 4, Table S1). We  
211 did not detect either species' presence at these additional sites, and instead only recorded the  
212 incidence of threats. Due to variable search effort and imperfect detection rates for these  
213 secretive species, additional surveys may show that they do occur at some of the 16 sites in  
214 which neither species was found. In all, we surveyed 63 localities (the numbers given above do  
215 not sum to 63 because *E. panamintina* and *B. campi* co-occur at 7 localities). We provide threat

216 scores for *E. panamintina* and *B. campi* across all known localities in Table 1. Below, we  
217 describe our results for both species in three separate sections: geographic distribution, natural  
218 history, and threats. In each section we compare our results against claims made in the literature,  
219 to clarify discrepancies.

## 220 **Geographic Distribution**

221 Across the western Great Basin and northern Mojave deserts of California, six named  
222 mountain ranges are known to support *E. panamintina*: the White, Inyo, Nelson, Coso, Argus,  
223 and Panamint mountains. In comparison, *B. campi* has a much more restricted distribution, and is  
224 known only from the Inyo Mountains (Figure 4). Banta (1965) predicted the occurrence of *E.*  
225 *panamintina* in three Nevada mountain ranges, Hammerson et al. (2005) included part of Nevada  
226 in their range map for the species, and Petersen et al. (2017) considered it “unconfirmed and  
227 potentially present” at two Nevada military installations. Nonetheless, no confirmed records exist  
228 for *E. panamintina* in Nevada, despite targeted survey effort in seemingly suitable habitat (J.  
229 Jones, Nevada Department of Wildlife, personal communication). Additionally, range maps by  
230 Hammerson (2004a, 2007) and Jockusch (2001) omit portions of the known distribution of *E.*  
231 *panamintina* and *B. campi*, respectively.

232 Elevation limits documented for *E. panamintina* range from 1,050 meters (m) (Surprise  
233 Canyon, Panamint Mountains; LACM PC 1738) to 2,330 m (Silver Canyon, White Mountains;  
234 LACM 187140). An imprecise record from Hunter Canyon, Inyo Mountains (LACM PC 2374)  
235 suggests that *E. panamintina* can occur below 600 m, but this remains unconfirmed. Elevation  
236 limits documented for *B. campi* are broader, ranging from 490 m (Hunter Canyon, MVZ  
237 150363–66) to 2,625 m (Lead Canyon, LACM PC 2379). Although other authors present  
238 different limits for one or both species (Behler and King 1979, Jockusch 2001, Stebbins 2003,

239 Mahrtdt and Beaman 2009, Adkins Giese et al. 2012, Stebbins and McGinnis 2012), these  
240 sources either rely on outdated citations or do not present any supporting data or vouchers.  
241 Nevertheless, we predict that future surveys will expand the known elevation limits of both  
242 species.

243 A total of 33 localities are reported for *E. panamintina*, but nine are unvouchered and  
244 remain unverified (Figure 4, Table S1). Of these 24 vouchered localities, we report eight here for  
245 the first time. Across all 33 localities, ten are in the White Mountains (Dixon 1975; Stebbins  
246 1985; Cunningham and Emmerich 2001), nine in the Inyo Mountains (Banta 1963; Giuliani  
247 1977; Stebbins 1985; Macey and Papenfuss 1991b; Banta et al. 1996), one in the Nelson  
248 Mountains (Banta 1963), one in the Coso Mountains (Giuliani 1993), five in the Argus  
249 Mountains (Phillips Brandt Reddick Inc. 1983; Michael Brandman Associates Inc. 1988;  
250 LaBerteaux and Garlinger 1998; Morafka et al. 2001), and seven in the Panamint Mountains  
251 (Stebbins 1958; Anonymous 1982; Stebbins 1985; Banta et al. 1996; Cunningham and  
252 Emmerich 2001; Morafka et al. 2001). Thirty localities are from Inyo County, and the remaining  
253 three are in Mono County. For *B. campi*, a total of 21 localities are reported, but two remain  
254 unvouchered and unverified (Figure 4, Table S1). Of these 19 vouchered localities, we report  
255 two here for the first time. Fourteen localities are on the east slope Inyo Mountains, and the  
256 remaining seven are on the west slope (Giuliani 1977, 1988, 1990; Clause et al. 2014). All are  
257 from Inyo County.

258 Much confusion exists in the literature regarding the known locality-level distribution of  
259 both *E. panamintina* and *B. campi*. In the case of *E. panamintina*, some localities are considered  
260 independent by some authors, but actually are nested (e.g., Brewery Spring and Limekiln Spring  
261 lie within Surprise Canyon). Other localities are listed as separate, but actually represent a

262 spatially proximate group of records best represented as a single locality (e.g., the many records  
263 from the southwestern CA Highway 168 corridor). Synonymous localities are also treated as  
264 different (e.g., Batchelder Spring = Toll House Spring), and some are incorrectly spelled  
265 (Westgard Pass misspelled as Westguard or West Guard), further adding to the confusion. These  
266 issues have led to repeated underreporting or overreporting of the true number of localities  
267 (Banta et al. 1996; Hammerson et al. 2005; Hammerson 2007; Mahrtdt and Beaman 2009).  
268 Compounding problems are caused by authors overlooking gray literature or citing outdated  
269 sources, resulting in further underreporting of the distributions of one or both species (Jennings  
270 and Hayes 1994; Jockusch 2001; Hammerson 2004a, 2004b; Adkins Giese et al. 2012, Stebbins  
271 and McGinnis 2012). Mislabeled museum specimens have also contributed to one error for *B.*  
272 *campi* that we correct here. Specimens MVZ 150377–86, listed as originating from Pat Keyes  
273 Canyon and accepted by Clause et al. (2014) as the sole substantiation of that locality, were in  
274 fact collected at McElvoy Canyon as shown by a careful reading of Giuliani (1977) and his  
275 unpublished 1976 field notes. Our examination of Kay Yanev’s field notes for these specimens  
276 also demonstrate that McElvoy Canyon is the correct locality, and that Giuliani was the original  
277 collector.

278 All reported localities for both *E. panamintina* and *B. campi* lie entirely on federal land  
279 (Table S1). Rangelwide, *E. panamintina* occurs on lands managed by the USDA Forest Service,  
280 Inyo National Forest (INF) (12 localities); U.S. Bureau of Land Management (BLM) (10  
281 localities); National Park Service, Death Valley National Park (DVNP) (8 localities, of which 2  
282 are shared with the BLM); and China Lake Naval Air Weapons Station (CLNAWS) (5  
283 localities). Three of these federal agencies also manage lands that support all reported localities  
284 for *B. campi*: BLM (13 localities), INF (7 localities), and DVNP (1 locality). These lands are all

285 under minimal or no development pressure, and they retain their natural character. We are  
286 unaware of any private land with habitat that is potentially suitable for *E. panamintina* or *B.*  
287 *campi*. This reality contradicts a statement by Jennings and Hayes (1994) that “all except two of  
288 the known populations of Panamint alligator lizard occur on private lands.” This statement was  
289 erroneous even in 1994, but has propagated widely across the literature (Hammerson 2007;  
290 Mahrtdt and Beaman 2009; Adkins Giese et al. 2012; Stebbins and McGinnis 2012; Thomson et  
291 al. 2016). Furthermore, Adkins Giese et al. (2012) make an implicit claim, without supporting  
292 evidence, that at least one population of *B. campi* is on private land.

293         The known distribution of both *E. panamintina* and *B. campi* solely on public land  
294 directly relates to their population health and habitat quality, which have been misinterpreted in  
295 the literature. Jennings and Hayes (1994) state that populations of *E. panamintina* are  
296 experiencing “habitat loss,” Adkins Giese et al. (2012) indicate a “decline” in the species, and  
297 Hammerson (2007) states that there is a “probably continuing decline” in both population size  
298 and extent and quality of habitat. Similarly, Hammerson (2004a) indicates a “continuing decline”  
299 in number of mature individuals and in extent and quality of habitat for *B. campi*, Evelyn and  
300 Sweet (2012) claim that abundance of *B. campi* has “likely declined,” Papenfuss and Macey  
301 (1986) assert that spring diversions “likely” led to extirpation of “some populations,” and Adkins  
302 Giese et al. (2012) state that water diversion “causes extirpations” of this species. However, all  
303 of these claims are speculative and unsupported by data. Although it is possible that localized  
304 declines may have gone undetected, there is no evidence of population declines, population  
305 extirpation, or population-scale habitat conversion for *E. panamintina* anywhere in its range. For  
306 *B. campi* our survey work indicates that five localities experienced recent habitat loss and

307 possible population declines due to flash floods, although the majority of *B. campi* localities that  
308 we surveyed have maintained their habitat and consequently, populations.

### 309 **Natural History**

310 Habitat requirements for *E. panamintina* and *B. campi* are an oft-misunderstood aspect of  
311 their natural history. Both species are typically considered narrow habitat specialists found only  
312 in microhabitats immediately adjacent to perennial surface water (Stebbins 1958; Marlow et al.  
313 1979; Papenfuss and Macey 1986; Jennings and Hayes 1994; Stebbins 2003; Hammerson et al.  
314 2005). However, this narrative ignores or minimizes both early (Banta 1963; Giuliani 1977) and  
315 more recent (Morrison and Hall 1999; Cunningham and Emmerich 2001) data showing much  
316 broader ecological tolerances for both species, although far more data exist for *E. panamintina*.

317 To date, 12 independent observations exist for *E. panamintina* in arid rocky habitat 2.7–  
318 6.4 kilometers (km) from perennial surface water or riparian habitat. These observations are  
319 spread across seven localities, and ten are supported by a museum voucher (MVZ 75918, MVZ  
320 150327–29, MVZ 227761, LACM PC 1835, LACM PC 1849, LACM TC 4376–77, UF-  
321 Herpetology 152976). The sightings include a mating pair (Morafka et al. 2001; LACM PC  
322 1849) and a likely gravid adult female (LACM TC 4377), suggesting that at least some  
323 observations reflect the existence of breeding populations in these areas. The recognition that *E.*  
324 *panamintina* occupies habitats far from surface water is analogous to our understanding of  
325 habitat use in the closely-related central peninsular alligator lizard, *Elgaria velazquezi*. Endemic  
326 to the deserts of Baja California Sur, Mexico (Leavitt et al. 2017), *E. velazquezi* was  
327 hypothesized to occur only at isolated oases (Grismer 1988; Grismer and McGuire 1993) but is  
328 now known from multiple arid, rocky localities several kilometers from the nearest perennial  
329 surface water or riparian zone (Grismer and Hollingsworth 2001).

330 For *B. campi*, four specimens (MVZ 190989–92) were collected from an “antifreeze  
331 pitfall trap set beside [a] mossy opening in limestone” atop a ridge about 0.4 km from the nearest  
332 riparian habitat (Giuliani 1977). Although five additional anecdotal accounts exist for *B. campi*  
333 individuals claimed to be found in nearly identical microhabitats “far from water” in moist  
334 ridgetop crevices (Giuliani 1977), these anecdotes are unvouchered and unsubstantiated by  
335 biologists. We did not survey the vouchered locality for verification, although we did survey  
336 some sites with similar microhabitat characteristics elsewhere but did not detect *B. campi*.  
337 Despite the pitfall-trapped specimens demonstrating that *B. campi* can occupy habitat far from  
338 flowing water, occupancy rates in suitable, moist, non-riparian microhabitats remain unknown.  
339 We encourage additional survey effort in these non-traditional areas to better resolve this  
340 situation, while recognizing that these surveys will likely be challenging because such habitat is  
341 rarely found at the surface. Nonetheless, well-documented vouchered records do show that  
342 neither *E. panamintina* nor *B. campi* is restricted solely to areas with flowing perennial water or  
343 riparian vegetation, contrary to earlier stereotypes and recent misstatements by some authors  
344 (Adkins Giese et al. 2012; Stebbins and McGinnis 2012). Although we recognize that the  
345 presence of *E. panamintina*, and particularly *B. campi*, in these more arid habitats does not  
346 necessarily reflect the existence of self-sustaining populations with long-term viability, this  
347 uncertainty also applies to many mesic localities where these species occur. More data are  
348 needed on the metapopulation dynamics that might influence the suitability and population  
349 stability across these two habitat types for both species.

350 In addition to a lack of information on habitat preference, no rigorous, comprehensive  
351 estimates of population size or occupied habitat exist for *E. panamintina* or *B. campi* (but see  
352 Larson et al. [1984]). As such, these metrics for evaluating the species’ imperilment remain

353 poorly quantified, and we instead use available data on the presence of suitable habitat, ongoing  
354 reproduction, and incidence of threats to infer population health elsewhere in this contribution.  
355 Estimates for *E. panamintina* by Hammerson et al. (2005) and Hammerson (2007), which are  
356 derived from an arbitrary assumption that 50 or more adults exist in each of 20 populations,  
357 yielded a total adult population estimate of at least 1,000 individuals. Hammerson et al. (2005)  
358 and Hammerson (2007) also provided a similarly coarse estimate of total occupied habitat of less  
359 than 5 km<sup>2</sup> for *E. panamintina*, based on the arbitrary assumption of dimensions of 2 km X 0.1  
360 km for each of about 20 occupied habitat patches. For *B. campi*, Larson et al. (1984) estimated a  
361 total effective population size of 14,000 across 12 populations, based on allele frequencies  
362 derived from allozyme data first published by Yanev and Wake (1981). Using field survey data  
363 from 12 occupied localities, Giuliani (1977) categorized *B. campi* habitat into four separate bins,  
364 reporting 11.9 linear mi of “excellent” and “good” habitat, and 10.3 linear mi of “poor” and  
365 “very poor” habitat. However, this analysis excluded substantial riparian habitat at those  
366 localities, due to access difficulties. Papenfuss and Macey (1986) subsequently produced  
367 estimates for 13 *B. campi* localities, 10 of which overlapped with those analyzed by Giuliani  
368 (1977). In their study, Papenfuss and Macey estimated 14.82 ha of “ideal habitat” for *B. campi*,  
369 but they did not specify their criteria for diagnosing such habitat. Adkins Giese et al. (2012)  
370 subsequently misinterpreted these studies and did not acknowledge their limitations, citing those  
371 works as support for their statement that occupied habitat for *B. campi* “totals less than 20 ha.”

## 372 **Threat Overview**

373 Table 1 quantifies our assessment of 12 discrete threats of potential concern for *E.*  
374 *panamintina* and/or *B. campi*: water diversions, climate change, flash floods, grazing, roads and  
375 off-highway vehicles, invasive plants, illegal marijuana cultivation, mining, disease, renewable



376 energy development, overutilization, and inadequate regulatory mechanisms. Below, we also  
377 offer a narrative account of these 12 threats, summarizing available data and contrasting our  
378 analysis with assertions in the literature. We particularly concentrate on Adkins Giese et al.  
379 (2012), because they present arguably the most liberal threat assessment for both species. We  
380 discuss the 12 threats in roughly decreasing order of severity, and we provide all raw threat  
381 occurrence data in Table S1.

382 *Threat of Water Diversions.*— The hydrology of surface flows in the mountain ranges inhabited  
383 by *E. panamintina* and *B. campi* is not well studied. However, these flows appear to be driven by  
384 precipitation, which feeds groundwater cells that discharge as perennial springs above the  
385 regional groundwater level (Patchick 1964; Jones 1965; Bedinger and Harrill 2012). We are  
386 unaware of any evidence to suggest that ongoing regional groundwater pumping, such as the  
387 highly-regulated groundwater withdrawal in the Owens Valley floor (Elmore et al. 2003), is  
388 decreasing surface flow at any site occupied by *E. panamintina* or *B. campi*.

389 The threat of water diversion or other anthropogenic change to hydrology is generally  
390 mentioned only in passing in the literature associated with *E. panamintina* (Jennings and Hayes  
391 1994; Hammerson et al. 2005; Adkins Giese et al. 2012; Thomson et al. 2016), and only one  
392 source gives a specific example of this threat affecting an occupied locality (Anonymous 1982).  
393 In contrast, Adkins Giese et al. (2012) feature this threat prominently in their discussion of *B.*  
394 *campi*, but cite Giuliani (1988) for support without recognizing the outdated nature of this  
395 source, similar to Hansen and Wake (2005). Giuliani (1988) described substantial degradation  
396 due to water diversions and grazing at Barrel Springs in the Inyo Mountains, a locality occupied  
397 by both *E. panamintina* and *B. campi*. However, our repeated surveys since 2013 indicate that  
398 the nearby mine is inactive, all water diversion infrastructure is defunct, grazing impacts are

399 nonexistent, and the riparian zone has regenerated to at least half of the linear extent described  
400 by Giuliani (1988). We have observed multiple individuals of both *E. panamintina* (including a  
401 likely gravid female) and *B. campi* (including juveniles and a gravid female) at this locality on  
402 several visits since 2013, indicating the presence of reproducing populations (A. G. Clause and  
403 C. J. Norment, unpublished data).

404 Cumulatively, our surveys documented active diversion infrastructure at five localities in  
405 the White Mountains occupied by *E. panamintina*, and at five other localities possibly occupied  
406 by this species in the White, Argus, and Coso mountains (Table S1). Stretches of riparian  
407 vegetation up to 150 m in length were killed off at two of these sites, seemingly due to lack of  
408 sufficient moisture. Although we did not document active water diversions at any localities  
409 occupied by *B. campi*, we did observe defunct water diversion infrastructure at six *B. campi*  
410 localities (some syntopically occupied by *E. panamintina*).

411 Although available evidence indicates that active water diversions are not currently  
412 widespread among the known localities for either species, and have decreased in occurrence  
413 from historical levels in parallel with a decrease in regional mining activity (discussed  
414 subsequently), such diversions still pose a current threat to *E. panamintina* and a potential future  
415 threat to both species. We emphasize the need for ongoing management of this threat throughout  
416 the range of both *E. panamintina* and *B. campi*, particularly in the context of increased future  
417 water demand due to climate change (discussed next).

418 *Threat of Climate Change.*— Recent climate models for California generally predict a hotter,  
419 wetter future climate statewide, but the direction and magnitude of these predicted changes  
420 fluctuates broadly depending on the model (Polade et al. 2017). According to one recent forecast,  
421 by 2060 the region inhabited by *E. panamintina* and *B. campi* will experience a mean

422 temperature increase of ca. 2–3°C, and a mean precipitation increase of ca. 10–60 mm (Wright et  
423 al. 2016). However, future climate regimes in California could also bring more extreme droughts  
424 (Cook et al. 2015; MacDonald et al. 2016; Swain et al. 2018) and reduced summer monsoon  
425 precipitation (Pascale et al. 2017). Although both *E. panamintina* and *B. campi* survived a  
426 prolonged regional mid-Holocene drought (LaMarche Jr. 1973), any climate-related loss of  
427 precipitation-fed riparian habitat would almost certainly be a stressor on populations occupying  
428 those habitats. In addition, droughts would likely create pressure to initiate new agricultural and  
429 municipal water diversions from these springs and creeks, potentially exacerbating the loss of  
430 riparian vegetation. Adkins Giese et al. (2012) briefly mention climate change as a threat to both  
431 *E. panamintina* and *B. campi*, but do not discuss climate forecast variability. Few other authors  
432 mention climate change as a threat to either species, and most do so only in passing (Hammerson  
433 2004b; Thomson et al. 2016).

434         In addition to large uncertainties surrounding California’s future climate, it remains  
435 unclear how severely the outcome of a hotter, wetter, yet more variable and thus drought-prone  
436 climate would affect *E. panamintina* and *B. campi* populations. Recent thermal modeling  
437 indicates that climate warming will likely depress the activity and energetics of arid-land lizards,  
438 but these studies predicted lower climate change-related extinction risk in anguids (which  
439 includes all alligator lizards) than most lizard families analyzed (Sinervo et al. 2010, 2017). In  
440 contrast, species-specific maximum entropy (Maxent) ecological niche models predict *E.*  
441 *panamintina* and *B. campi* to be at high and intermediate risk, respectively, of climate change  
442 creating conditions unsuitable for population persistence by 2050 (Wright et al. 2013).  
443 Nonetheless, it is unclear if riparian-zone populations would become extirpated or instead persist  
444 at lower population sizes in more restricted patches of non-riparian habitat. It is also unclear if

445 populations inhabiting rocky areas far from riparian zones or standing surface water will become  
446 extirpated under those future climatic conditions, although again those conditions would likely  
447 be a strong stressor on those populations, particularly for *B. campi*.

448         Ultimately, we consider climate change to be perhaps the greatest potential threat to the  
449 long-term persistence of both species, both intrinsically and because it could worsen the stressors  
450 of water diversions (discussed previously) and flash floods (discussed next).

451 *Threat of Flash Floods.*—Beaty (1963) suggested that flash floods occur regularly in the White  
452 Mountains, caused primarily by localized summer thunderstorms. Dramatic re-sculpturing of  
453 canyon topography and severe destruction to riparian vegetation are typical results. Across the  
454 ranges of *E. panamintina* and *B. campi*, forecasted wetter climate regimes in California could  
455 exacerbate the frequency and/or severity of these flash floods in the future (Modrick and  
456 Georgakakos 2015; Polade et al. 2017; Swain et al. 2018), but see Pascale et al. (2017) for  
457 alternative predictions. Hansen and Wake (2005) and Adkins Giese et al. (2012) discuss the  
458 threat of flash floods to *B. campi*, but only Cunningham (2010) mentions this threat for *E.*  
459 *panamintina*. Based on our surveys and several published sources (Giuliani 1990; Hansen and  
460 Wake 2005; Cunningham 2010), over the last 30 years at least seven thunderstorms have caused  
461 flash floods across eight Inyo Mountains localities occupied by *E. panamintina* and/or *B. campi*,  
462 plus an additional locality occupied by *E. panamintina* in the Panamint Mountains (Table S1).  
463 Additional flash floods, throughout the range of both species, likely remained undocumented  
464 during that period. However, based on our surveys and those of Giuliani (1996), following a  
465 documented flash flood *E. panamintina* has persisted at every locality and *B. campi* has persisted  
466 at most. There are three localities at which *B. campi* has not been detected in post-flood  
467 resurveys: the south fork of Union Wash (although *E. panamintina* has persisted there),

468 Waucoba Canyon, and the middle fork of Willow Creek (C. J. Norment, unpublished data).  
469 Although recent flash floods have damaged or destroyed known habitat for *B. campi* and *E.*  
470 *panamintina*, our surveys also suggest that many known localities of both species are likely  
471 insulated from this threat because occupied habitat lies in side-canyon drainages too small to  
472 capture enough rainfall for scouring to occur. Furthermore, because heavy rainfall is a known  
473 behavioral cue for many organisms, including stream abandonment behavior in a few  
474 invertebrate taxa (Lytle 1999), *E. panamintina* and *B. campi* could possess behavioral  
475 mechanisms to help them escape flash floods. Regardless of possible mechanisms, ultimately  
476 flash floods represent a natural disturbance regime that both species have withstood for  
477 millennia. However, flooding could certainly act as a driver of local extinctions in a  
478 metapopulation dynamic, and we hypothesize that more frequent or extreme flash floods might  
479 exceed the recolonization or demographic capacity of both species to respond to this stressor in  
480 the future.

481 *Threat of Grazing.*—Feral burros and feral horses have populated much of California’s desert  
482 wildlands for decades, primarily a legacy of abandoned stock associated with historic settlers and  
483 miners (Weaver 1974). The negative effects and widespread distribution of feral burros in DVNP  
484 were discussed by Sanchez (1974), and Giuliani (1977) subsequently documented extensive  
485 damage by feral burros to riparian zones at multiple *B. campi* localities in the adjacent east slope  
486 Inyo Mountains. Surveys at the *E. panamintina*-occupied Haiwee Spring in the Coso Mountains  
487 reported it as suffering “heavy” and “concentrated” use by feral burros (Woodward and  
488 McDonald 1979), and Giuliani (1993) later reported “over-grazing” by cattle and continued  
489 presence of feral burros at this locality. A review by Kauffman and Krueger (1984) demonstrated  
490 that intense grazing by non-native ungulates typically causes direct loss of riparian vegetation

491 cover due to browsing, breaking, and trampling, accompanied by compaction and erosion of  
492 soils. Jones (1981) correlated these structural habitat changes with reduced lizard community  
493 abundance and diversity in Arizona. Reinsche (2008) subsequently reviewed additional studies  
494 that variously resolved both positive and negative effects of grazing on several lizard  
495 assemblages in arid and semi-arid landscapes. Although none of these studies involved alligator  
496 lizards or salamanders, we consider it reasonable that heavy grazing pressure is likely not  
497 beneficial to either *E. panamintina* or *B. campi* due to negative effects such as reduced  
498 vegetative cover, disturbance of microsites, and contamination of water sources.

499         Importantly, contemporary grazing severity at most localities for both species is reduced  
500 from historical levels, due to major removal efforts by federal land managers. From 1979–1981,  
501 the BLM removed over 1,500 feral burros from the east-slope Inyo Mountains (Papenfuss and  
502 Macey 1986). From the 1980s to 2005, the Navy removed 9,500 feral burros and 3,280 feral  
503 horses from CLNAWS lands. Navy removals are ongoing, to fulfill the CLNAWS  
504 Comprehensive Land Use Management Plan objectives of eliminating feral burros and  
505 maintaining a cumulative feral horse herd of 170 animals (U.S. Navy and Bureau of Land  
506 Management 2005). The BLM cooperates with the Navy in this effort, and has removed  
507 hundreds of additional feral ungulates from adjacent BLM lands known to support *E.*  
508 *panamintina*. Moreover, DVNP has engaged in control of feral ungulates since 1939 (Sanchez  
509 1974). The Park Service has removed hundreds of burros from within DVNP; cooperatively  
510 implements burro control on adjacent BLM lands; has a long-term management goal of zero  
511 burros within the park; and plans to retire cattle from the Hunter Mountain allotment, which  
512 supports a known *E. panamintina* locality (National Park Service 2002).

513           The effects of these control efforts have been dramatic in many areas, although feral  
514 ungulates are far from being completely eradicated from the range of *E. panamintina* or *B.*  
515 *campi*. Our surveys documented grazing damage to riparian habitat at only two *E. panamintina*  
516 localities: one each in the Argus and Nelson mountains. Elsewhere in the Argus Mountains, on  
517 land managed by the CLNAWS and BLM, surveys by LaBerteaux and Garlinger (1998)  
518 indicated “low” or “moderate” feral burro grazing impacts at four additional *E. panamintina*  
519 localities that we did not survey. Nonetheless, anecdotal evidence suggests that grazing impacts  
520 could remain high in parts of the Argus, Nelson, Coso and Panamint mountains, which were  
521 comparatively under-represented in our recent surveys for *E. panamintina*. Ongoing removal  
522 efforts in these three ranges might be below annual recruitment rates, suggesting that populations  
523 of feral burros and perhaps feral horses could be on the rise in these areas (Tom Campbell,  
524 CLNAWS, personal communication). Moreover, funding constraints and deep-seated political  
525 controversy (e.g., Animal Welfare Institute [2012]) complicate the long-term management or  
526 eradication of feral ungulates (Crowley et al. 2017). Ultimately, current data on grazing severity  
527 are unavailable for many localities, particularly for *E. panamintina*. Nonetheless, our surveys  
528 found no evidence of feral or domestic ungulate grazing at any *B. campi* locality, and we  
529 consider it unlikely that this threat would cover a large portion of the species’ range due to the  
530 many inaccessible locations it occupies.

531           Adkins Giese et al. (2012) largely overlook data that indicate recent but variable  
532 reductions in non-native grazing animals on rangelands. Instead, they cite outdated secondary  
533 sources (Papenfuss and Macey 1986; Jennings and Hayes 1994) to support their claims that  
534 grazing is a major contemporary threat to both *E. panamintina* and *B. campi*. Adkins Giese et al.  
535 (2012) also incorrectly cite a third source (Mahrtdt and Beaman 2002) by claiming that

536 overgrazing “is” a threat to *E. panamintina* when Mahrtdt and Beaman (2002) indicate only that it  
537 “could” be a threat.

538 *Threat of Roads and Off-Highway Vehicles.*— Neither roads nor off-highway vehicles (OHV)  
539 are mentioned in the literature as a threat to *B. campi*, save for an unsubstantiated claim by  
540 Evelyn and Sweet (2012) that “road construction” is a likely contributor to declines. However,  
541 Adkins Giese et al. (2012) make several erroneous statements about the threat these factors pose  
542 to *E. panamintina*. They overlook contrary evidence to claim that OHV use “has increased  
543 significantly” in the Panamint Mountains, and that road “construction” threatens the species. For  
544 both claims, they cite only Mahrtdt and Beaman (2002) for support, despite that source’s outdated  
545 nature and lack of supporting documentation. Adkins Giese et al. (2012) also mischaracterize a  
546 statement by Mahrtdt and Beaman (2002), claiming that vehicular traffic “threatens lizard  
547 populations” when their source says only that it “could threaten lizard populations.”

548 Available evidence indicates that roads do pose an ongoing threat to *E. panamintina*, but  
549 no threat to *B. campi*. A two-lane paved road parallels or bisects occupied habitat at four known  
550 *E. panamintina* localities. At one of these localities, multiple road-killed *E. panamintina* have  
551 been documented (Morrison and Hall 1999; Cunningham and Emmerich 2001; specimens UF-  
552 Herpetology 152976 and LACM 189186). However, the sole patch of riparian vegetation (which  
553 the road bisects) and nearby roadside talus still consistently yield detections of this species 43  
554 years after their discovery there (Dixon 1975). Furthermore, although data are limited, there is no  
555 indication of a decline in detection probability; our annual surveys of the spring-fed riparian  
556 habitat since 2013 have documented over two dozen individual lizards, about one-quarter of  
557 which were juveniles (A. G. Clause, unpublished data). Elsewhere in the range of *E.*  
558 *panamintina*, dirt access roads regularly approach the mouths of occupied canyons, but only at



559 seven localities do dirt roads parallel and/or bisect riparian or talus habitat. Although grading and  
560 widening of three of these dirt roads in 2012 damaged riparian plants (Klingler 2015), our  
561 surveys indicate that much of the vegetation has since recovered. For *B. campi*, no paved road  
562 exists within 3 km of occupied habitat. Furthermore, only at four localities does a dirt road  
563 approach within 2 km of occupied habitat, and those roads never reach riparian zones inhabited  
564 by *B. campi*. At one locality (Barrel Springs), an old dirt road that closely approached occupied  
565 riparian habitat is now completely impassable to vehicles due to intentional placement of  
566 boulders in the roadcut.

567         The related threat of OHV use is even less consequential to *E. panamintina* and again a  
568 non-threat to *B. campi*. Many canyons where these species occur have multiple steep, bedrock  
569 waterfalls (Giuliani 1977) that restrict OHV passage (Figure 3). Except for one locality in the  
570 White Mountains (Redding Canyon), our surveys did not document evidence of unauthorized  
571 OHV use in or along riparian habitats occupied by *E. panamintina*. Contrary to statements made  
572 by Adkins-Giese et al. (2012), the severity of this threat has been much reduced from historical  
573 levels, due to targeted efforts by federal land managers. Over 15 years ago, the BLM prohibited  
574 all vehicular travel at the *E. panamintina* type locality in the Panamint Mountains (BLM 2001).  
575 Our surveys show that this canyon's riparian zone has regenerated substantially in the absence of  
576 vehicular traffic, reclaiming much of the former dirt road that was a popular site for OHV  
577 enthusiasts. For *B. campi*, we are unaware of any OHV use at a known locality.

578 *Threat of Invasive Plants.*— The only non-native plant mentioned in the literature, or that we  
579 identified during our surveys, as a threat to *E. panamintina* or *B. campi* is saltcedar or tamarisk,  
580 *Tamarix* spp. These shrubs or small trees can form dense monoculture stands in invaded riparian  
581 areas (Di Tomaso 1998); they have variable, but sometimes high, evapotranspiration rates that

582 can potentially reduce surface water availability (Cleverly 2013; Nagler and Glenn 2013); and  
583 they are often correlated with elevated salinity levels in soil and groundwater, although causation  
584 has rarely been demonstrated (Ohrman and Lair 2013). Research into the effect of *Tamarix* on  
585 lizard communities in the arid southwestern U.S. was reviewed by Bateman et al. (2013), and  
586 although no study involves alligator lizards, available research generally reveals a pattern of  
587 reduced lizard diversity and abundance in *Tamarix* stands relative to uninvaded riparian habitat.  
588 We are unaware of any studies exploring the effect of *Tamarix* on salamanders, but we infer that  
589 reduced surface water availability and elevated salinity levels would likely negatively affect *B.*  
590 *campi*.

591 LaBerteaux and Garlinger (1998), documented *Tamarix* at two known *E. panamintina*  
592 localities in the Argus Mountains, but noted that the plants were highly localized across the  
593 riparian habitat. DeDecker (1991) indicated a “widespread infestation” of *Tamarix* in low-  
594 elevation reaches of the west slope White and Inyo Mountains, where the plant had become a  
595 “serious threat to springs and seeps.” Adkins Giese et al. (2012) considered *Tamarix* a threat to  
596 *E. panamintina*, and cited DeDecker (1991) and Mahrtdt and Beaman (2002) to support their  
597 position. However, Mahrtdt and Beaman (2002) only paraphrase statements from DeDecker  
598 (1991) for support and present no novel data. In a subsequent work, Mahrtdt and Beaman (2009)  
599 again mentioned invasive plants and *Tamarix* as a possible threat to *E. panamintina* without  
600 offering supporting evidence. In contrast, to our knowledge no published source identifies  
601 invasive plants or *Tamarix* as a possible threat to *B. campi*.

602 Although it was likely more abundant in the region historically as indicated by DeDecker  
603 (1991), our survey data indicate that *Tamarix* is currently neither a widespread nor severe threat  
604 to *E. panamintina* or *B. campi*, although it is a greater threat to the latter species. Our surveys

605 documented *Tamarix* at ten localities in the Inyo Mountains, of which three were occupied by *E.*  
606 *panamintina* and seven occupied by *B. campi*. Of these ten localities, four support < 20 plants  
607 and appear to be in an early stage of colonization, three support established populations that were  
608 recently treated mechanically and chemically by the BLM with some success, and two support  
609 plants only at the canyon mouth far from habitat occupied by either species. Elsewhere within  
610 the range of *E. panamintina*, our surveys documented *Tamarix* at only one additional locality,  
611 where the plants were present low in the canyon far from occupied habitat. Cumulatively, there  
612 is little evidence that *Tamarix* or other invasive plants currently pose a substantial threat to *E.*  
613 *panamintina* or *B. campi*. This reality is attributable, in large part, to decades of *Tamarix* control  
614 efforts by multiple federal agencies. Nonetheless, without concerted management this threat  
615 could worsen in the near future given the capacity of *Tamarix* to colonize and spread.

616 *Threat of Illegal Marijuana Cultivation.*—No literature source mentions marijuana grows as a  
617 threat to either *E. panamintina* or *B. campi*. However, since 2014 our surveys revealed three  
618 recently destroyed or abandoned marijuana grows in remote canyons: one at an *E. panamintina*  
619 locality in the east slope Argus Mountains, one at a *B. campi* locality in the east slope Inyo  
620 Mountains, and one in the Inyo Mountains at a locality that could support one or both species. At  
621 the grow site in the Argus Mountains, we observed chopping damage to mature willows,  
622 terracing of the slopes immediately adjacent to the riparian zone, compaction of leaf litter, and  
623 defunct water diversion driplines, with these impacts covering a 2-hectare area. Additional  
624 negative effects, such as other forms of streamflow diversion (Bauer et al. 2015) along with  
625 water and soil contamination from pesticide/herbicide application, are also probable. Installation  
626 of similar grows elsewhere is a future threat to the riparian habitat of *E. panamintina* and *B.*  
627 *campi*, particularly in isolated canyons otherwise exposed to minimal direct human activities, as

628 has been found elsewhere in California wildlands (Butsic and Brenner 2016). Although we  
629 caution that clandestine activities such as illegal marijuana cultivation are inherently challenging  
630 to quantify, which complicates any assessment of their prevalence or severity, this threat  
631 warrants ongoing management attention.

632 *Threat of Mining.*— Knopf (1912) described a widespread decline in mining activity across the  
633 Inyo and White mountains beginning in the late 19<sup>th</sup> century. A review of Inyo Mountains  
634 mineral resources by McKee et al. (1985) indicated the general continuation of this pattern, albeit  
635 with periodic spikes in mining activity corresponding to rises in gold prices. Papenfuss and  
636 Macey (1986) subsequently reported 361 mining claims in the Inyo Mountains “filed in and  
637 around 13 canyons where [*B. campi*] is found,” some of which also support *E. panamintina*.  
638 However, these authors did not define the phrase “in and around,” nor did they indicate which  
639 mining claims were active, inactive, or not yet acted upon. Adkins Giese et al. (2012) list mining  
640 as a threat to both *E. panamintina* and *B. campi*, but they provide no examples to support their  
641 assertions nor do they acknowledge the limitations of the Papenfuss and Macey (1986) source,  
642 which they cite in their discussion of *B. campi*. Other authors (Hammerson 2004b, Hansen and  
643 Wake 2005) cite Papenfuss and Macey (1986) in a similar fashion, overlooking its outdated  
644 nature, particularly in the case of *B. campi*, because all known populations of the species now  
645 occur either within DVNP or the Inyo Mountains Wilderness, which was created in 1994.  
646 Although wilderness designation offers some protection for at-risk species and their habitats,  
647 valid mining claims existing prior to 1 January 1984 can legally be exploited; permitted activities  
648 include “where essential the use of mechanized ground...equipment” and “use of land  
649 for...waterlines” (Legal Information Institute undated).

650 In keeping with the general decline in mining noted by Knopf (1912) and McKee et al.  
651 (1985), our surveys suggest that mining has continued to decline across the known range of both  
652 species, and is not currently affecting the habitat of either. Although the large footprint of the  
653 active Briggs gold mine in the Panamint Mountains lies adjacent to riparian habitat that might be  
654 occupied by *E. panamintina*, our surveys revealed no active mines within 0.8 km of known *E.*  
655 *panamintina* or *B. campi* habitat—only abandoned ones. We regularly documented old mining-  
656 related debris among riparian habitat occupied by both species but we never observed water  
657 flowing from abandoned mines or mine tailings, suggesting minimal water pollution by mining-  
658 related contaminants. Nonetheless, legacy effects of mining in the region have not been well-  
659 studied. Despite the apparent regional decline in mining activity, it has not ceased completely  
660 and economic shifts in the supply/demand of gold, silver, and other minerals could increase  
661 regional mining pressures in the future. For instance, an application to re-open the Robbie Hoyt  
662 Memorial Mine at a known *E. panamintina* locality in the White Mountains, which proposes  
663 widening a dirt road that currently impinges on occupied riparian habitat, was recently submitted  
664 for review (Inyo National Forest 2017a). Furthermore, a controversial application for a large  
665 gold mine on the Conglomerate Mesa, Inyo Mountains, which was later formally withdrawn  
666 (Timberline Resources Corporation 2008), has also been recently re-opened (Silver Standard  
667 Resources Inc. 2016). Ongoing vigilance by land managers against potential future mining  
668 threats remains essential.

669 *Threat of Disease.*—No authors claim that disease threatens *E. panamintina* or *B. campi*, and no  
670 documentation exists of wild individuals of either species showing outward signs of ill health.  
671 Nevertheless, the future and possible current threat posed to *B. campi* from the disease

672 chytridiomycosis, which is caused by the fungi *Batrachochytrium salamandrivorans* (*Bsal*), and  
673 *B. dendrobatidis* (*Bd*), warrants consideration.

674         Due to its recent discovery (Martel et al. 2013), *Bsal* remains poorly studied. Although it  
675 has not yet been documented in North America, *Bsal* has devastated salamander populations in  
676 northern Europe (Yap et al. 2017). In the region where *B. campi* occurs, spatial models predict  
677 low to moderate habitat suitability for *Bsal* (Yap et al. 2015), and low to moderate salamander  
678 vulnerability to *Bsal* (Richgels et al. 2016), although the latter result could be an artifact of low  
679 salamander species diversity in the region. In comparison, *Bd* is better studied and has been  
680 correlated with enigmatic declines in terrestrial plethodontid salamanders (Cheng et al. 2011).  
681 Nonetheless, field and laboratory studies indicate highly variable *Bd* infection rates among this  
682 group of salamanders, to which *B. campi* belongs (Van Rooij et al. 2011; Moffitt et al. 2015;  
683 Mendoza-Almeralla et al. 2016). One study of *Batrachoseps attenuatus* revealed evidence of  
684 mixed susceptibility to *Bd* and no evidence of measurable declines in wild populations  
685 (Weinstein 2009), while a retrospective analysis of three species of *Batrachoseps* from insular  
686 populations revealed consistently low prevalence of *Bd* infection (Yap et al. 2016). Conversely, a  
687 retrospective study of *B. attenuatus* negatively correlated modern-day population persistence  
688 with time to first detection of *Bd* infection (Sette et al. 2015). The sister species to *B. campi* (*B.*  
689 *wrighti*; Jockusch et al., 2015) is known to be capable of infection based on a single *Bd*-positive  
690 specimen (Weinstein, 2009), but no other information relating to chytridiomycosis susceptibility  
691 exists for the *Plethopsis* subgenus of *Batrachoseps*, which includes *B. campi*. The deep  
692 evolutionary divergence of *Plethopsis* (ca. 40 MYA; Shen et al. 2016) coupled with the  
693 ecological extremes inhabited by its component species (Jockusch and Wake 2002) could limit  
694 accurate inference about the effects of chytridiomycosis on *B. campi* populations using data from

695 non-*Plethopsis* congeners. Thus, *Plethopsis*-specific chytridiomycosis research is needed to  
696 evaluate the threat this disease might pose to *B. campi*.

697 *Threat of Renewable Energy Development.*—Although the literature for *E. panamintina* and *B.*  
698 *campi* does not mention renewable energy development as a stressor, we consider it worthy of  
699 management attention for *E. panamintina*. Utility-scale solar projects have been proposed by the  
700 Los Angeles Department of Water and Power in the Owens Valley at the base of the Inyo  
701 Mountains, and although these proposals were later withdrawn or cancelled (Manzanar  
702 Committee 2015), if reopened in the future such projects could impact the lower edge of *E.*  
703 *panamintina* habitat on upper alluvial fans at canyon mouths. Furthermore, a major geothermal  
704 energy development project in the Coso Mountains is less than 10 km from a known *E.*  
705 *panamintina* locality, and potentially suitable talus habitat exists within the project footprint.  
706 However, this habitat has never been surveyed for the species, and the draft Environmental  
707 Impact Statement did not consider possible impacts to *E. panamintina* (BLM 2012). Despite a  
708 lack of evidence that *E. panamintina* is currently being affected by this or any other energy  
709 infrastructure, renewable energy is a growth industry in the California deserts (CA Senate Bill  
710 No. 2 2011; California Energy Commission 2014) and thus warrants ongoing attention as a  
711 potential future threat.

712 *Threat of Overutilization.*—The issue of overutilization has received attention in the literature for  
713 *E. panamintina* and *B. campi*, but this attention has been speculative. For *E. panamintina*,  
714 Mahrtdt and Beaman (2002, 2009) indicated that illegal collecting “may” threaten populations,  
715 and Adkins Giese et al. (2012) cited the former source as the sole support for their claim that  
716 illegal collection “likely threatens populations” of the species. Giuliani (1977, 1988, 1990)

717 expressed concern about collector-driven disturbance to *B. campi* populations, but he did not  
718 specify the basis for those concerns.

719 To our knowledge, no major hobbyist market exists for any species of *Batrachoseps* or  
720 *Elgaria*. We are also unaware of any evidence that overutilization is a population-level threat to  
721 *E. panamintina* or *B. campi*. Furthermore, both species are likely inherently resistant to  
722 overutilization due to their secretive life histories, generally low detection rates (Giuliani 1977,  
723 1996; C. J. Norment, unpublished data), and occupancy of remote, rugged habitats (Figure 1,  
724 Figure 2). Reported scientific whole-body collection of *E. panamintina* amounts to fewer than 50  
725 specimens spread across 16 localities over a period of 60+ years. Similarly, reported whole-body  
726 collection of *B. campi* sums to fewer than 200 individuals across 17 localities over a period of  
727 40+ years. Collecting at these levels over such extended time periods is unlikely to have an  
728 appreciable effect on population persistence (Dubois and Nemésio 2007; Krell and Wheeler  
729 2014; Poe and Armijo 2014; Rocha et al. 2014; Hope et al. 2018). Furthermore, current lethal  
730 scientific collection of both species is strictly regulated, and generally allowed only when  
731 documenting a new locality (L. Patterson, CDFW, personal communication). Nonetheless,  
732 quantifying the magnitude of legal and illegal wildlife trade is challenging, and can be prone to  
733 underestimation (Salzberg 1996; Schlaepfer et al. 2005).

734 Our surveys documented no evidence of collector-driven habitat disturbance, and we  
735 encountered possible collecting equipment only twice: two plywood boards (one since removed  
736 by unknown person[s]) at an occupied *E. panamintina* locality, and wood roofing shingles at a  
737 locality occupied by both *E. panamintina* and *B. campi*. Importantly, none of these cover objects  
738 showed signs of recent disturbance during our repeated surveys, suggesting a lack of regular  
739 visitation. Furthermore, these two localities represent the most easily-accessible sites for these



740 species. For this reason, these sites would potentially be those most strongly affected by illegal  
741 collecting pressure; yet, they support populations that repeatedly yielded captures of multiple  
742 individuals, including juveniles, during our surveys (A. G. Clause and C. J. Norment,  
743 unpublished data).

744 *Threat of Inadequate Regulatory Mechanisms.*—Several sources mention the existing state and  
745 federal regulatory mechanisms that cover *E. panamintina* and *B. campi* in California, in  
746 generally positive terms (e.g., Hansen and Wake 2005; Thomson et al. 2016). However, Adkins  
747 Giese et al. (2012) downplay these government protections, characterizing them as “insufficient”  
748 and “inadequate.” Importantly, Adkins Giese et al. (2012) do not fully acknowledge the role  
749 played by these regulations in past management actions implemented specifically to mitigate  
750 several threats to *E. panamintina* and *B. campi*. As discussed previously, existing legal  
751 protections have directly motivated beneficial interventions on behalf of both species in recent  
752 decades, resulting in decreased levels of grazing, OHV use, and invasive *Tamarix* spp. in  
753 occupied habitat.

754 At the state level, under California Code of Regulations Title 14 Sections 5.05 and 5.60,  
755 there is a zero bag limit for *E. panamintina* and *B. campi* under sportfishing regulations, making  
756 it illegal to collect either species for recreational purposes. A recreational collecting moratorium  
757 also exists for all *Batrachoseps* salamanders in Inyo County. Moreover, it is illegal to  
758 commercially collect either *E. panamintina* or *B. campi* in California unless a biological supply  
759 house obtains specific authorization from the California Department of Fish and Wildlife  
760 (CDFW) to collect them for sale to bona fide scientific and educational facilities—an unlikely  
761 scenario for these species (L. Patterson, CDFW, personal communication). For over 20 years, *E.*  
762 *panamintina* and *B. campi* have also been administratively designated as Species of Special

763 Concern by CDFW. This designation is intended to direct research and management toward  
764 enigmatic but likely imperiled species as a means to prevent more stringent future listing, but it  
765 does not directly regulate destruction of habitats or individuals (Jennings and Hayes 1994;  
766 Thomson et al. 2016). Also, the State of California has some jurisdiction over water diversions  
767 on federal land through the California Environmental Quality Act (CEQA). Under this statute,  
768 surface water cannot be legally diverted without a state permit; applications to divert are made  
769 through the California Water Resources Control Board, which would require a CEQA analysis (S.  
770 Parmenter, CDFW, personal communication). This process could provide an additional level of  
771 regulatory protection for *E. panamintina* and *B. campi*, as long as the State of California has the  
772 political will to prevent water diversions in sensitive habitat.

773         At the federal level, both species are currently designated as Sensitive by the BLM (BLM  
774 2006), and Species of Conservation Concern by the USDA Forest Service (under FSM 2670).  
775 The BLM is mandated to manage Sensitive species and their habitat in a multi-use context, by  
776 minimizing threats affecting the species and improving habitat, where applicable (BLM 2008).  
777 The USDA Forest Service is mandated to develop and implement management objectives for  
778 Species of Conservation Concern and their habitat. This management is designed to ensure that  
779 the species maintain viable populations on Forest Service lands, and do not become threatened or  
780 endangered due to Forest Service actions (see FSM 2670). However, in their ongoing Forest Plan  
781 revision, the Inyo National Forest proposed to exclude *E. panamintina* from their Species of  
782 Conservation Concern list (Inyo National Forest 2017b), which would decrease management  
783 attention for over one-third of the species' known populations.

784         Legal protection of *E. panamintina*, *B. campi*, and their habitats would be strengthened  
785 by ESA listing and would help compensate for possible lax enforcement or even the repeal of

786 existing protections in the future. Nevertheless, historical regulatory protections have clearly  
787 improved the status of both species, and there is no signal to suggest that similarly beneficial  
788 management will cease in the near future.

789

790

791

### Conclusion and Recommendations

792

793

794

795

796

797

798

799

800

801

802

803

804

805

806

807

808

Although scientific information on *E. panamintina* and *B. campi* is limited, our literature review and threat analysis show that available information often contradicts or highlights uncertainty associated with historical and contemporary literature for both species. Although many knowledge gaps remain and additional data are needed, we consider the current conservation status of *E. panamintina* and *B. campi* to be relatively secure, although *B. campi* is comparatively more imperiled due to flash flood impacts on habitat and populations. It is true that both species are California endemics known from comparatively few localities, which places them at increased risk for local stochastic extinction; however, all known populations occur exclusively on federally managed land that retains or is recovering its natural character under existing regulatory mechanisms and associated management efforts. Although it is possible that localized declines may have gone undetected, no evidence exists of population declines, population extirpation, or large-scale habitat conversion for *E. panamintina*, and habitat loss and possible population declines are documented at only five sites for *B. campi*, all due to flash floods.

Of the 12 threats to *E. panamintina* and/or *B. campi* that we identified in our review, only three appear to be currently important: water diversions, climate change, and flash floods. Available data indicate that water diversions actively threaten multiple populations of *E.*

809 *panamintina* and formerly threatened some *B. campi* populations. Pressure to initiate new  
810 diversions might increase in the future under predicted climate change scenarios, or if federal  
811 regulations are relaxed regarding wilderness area protection or mining claim development.  
812 Shrinking riparian zones under a hotter, more drought-prone predicted climate is also a concern.  
813 Additionally, if climate change causes more severe and/or frequent summer thunderstorms, the  
814 resulting destructive flash floods could exceed the adaptive capacity of populations of both  
815 species to deal with this stressor, and flash floods seem to have caused recent declines at some *B.*  
816 *campi* localities. However, substantial uncertainty exists in the regional climate forecasts across  
817 the range of both species. Available evidence (albeit more substantial for *E. panamintina* than *B.*  
818 *campi*) suggests that populations can persist in more arid, rocky habitat far from canyon-bottom  
819 riparian zones, although such non-riparian habitat may be rarely occupied by *B. campi* and may  
820 support smaller, less stable populations compared to riparian habitat.

821         Based on available data, the nine remaining threats to both species (grazing, roads and  
822 OHV use, invasive plants, illegal marijuana cultivation, mining, disease, renewable energy  
823 development, overutilization, and insufficient regulatory protection) are neither widespread nor  
824 severe at this time. Threats due to mining have declined from historical levels, and threats due to  
825 grazing, OHV use, and invasive *Tamarix* spp. have been reduced from historical levels through  
826 targeted action by federal land managers. However, we emphasize that these nine threats could  
827 become more severe in the future, in part due to potential changes in the political and regulatory  
828 landscape. Ongoing stewardship by resource managers is necessary to appropriately safeguard  
829 populations of *E. panamintina* and *B. campi*.

830         Broadly, the results of our threat assessment are independently supported. Using a  
831 rigorous, transparent eight-metric risk assessment framework, Thomson et al. (2016) identified

832 and scored 45 imperiled yet non-ESA-listed amphibian and reptile taxa across their entire known  
833 distribution in the United States (all in California). The cumulative threat scores for *E.*  
834 *panamintina* and *B. campi* ranked low (28<sup>th</sup> and 19<sup>th</sup>, respectively) within this cohort of taxa,  
835 corroborating our assessment of the comparatively secure conservation status of these two  
836 species. Remarkably, of the 15 most threatened taxa identified by Thomson et al. (2016), only  
837 four were included in the Adkins Giese et al. (2012) ESA petition. This discrepancy alludes to  
838 what we perceive as a disconnect between scientific knowledge and the species selection process  
839 used by Adkins Giese et al. (2012). Although Thomson et al. (2016) was published four years  
840 after Adkins Giese et al. (2012), most of the same data and sources were available to and used by  
841 both sets of authors.

842         A similar, although less pronounced, disconnect also exists between current scientific  
843 knowledge and the IUCN Red List categorizations for *E. panamintina* and *B. campi*. The  
844 categorization for both species hinges on judgments that in some cases are weakly supported by  
845 contemporary data, an unsurprising result given that these species accounts were generated over  
846 a decade ago (Hammerson 2004a, 2007). For *E. panamintina*, the Vulnerable categorization rests  
847 on the assumption that there is continuing decline in the number of mature individuals, and that  
848 no subpopulation exceeds 1,000 mature individuals, fulfilling criterion C2a(i) (Hammerson  
849 2007). The categorization of *B. campi* as Endangered rests on the assumption that there are  
850 continuing declines in habitat extent, habitat quality, and number of mature individuals, fulfilling  
851 criteria B1b(iii,v) and B2b(iii,v) (Hammerson 2004a). Appropriately, Hammerson (2004a, 2007)  
852 qualifies his judgments throughout, and makes it clear that they are inferences or projections.  
853 However, no rigorous, comprehensive estimates of historical or contemporary population size, or  
854 number of mature individuals, exist for either species. Nor is there clear evidence of widespread,

855 critical declines in habitat extent or quality, particularly for *E. panamintina*. Furthermore, based  
856 on the available evidence, inferences or projections that widespread population declines have  
857 occurred are weak, for three reasons. First, all contemporary resurveys of historical localities  
858 have produced detections (with three exceptions for *B. campi*), a result that would be unexpected  
859 if widespread declines had occurred. Second, although available data are limited, there is no  
860 strong signal of decreasing detections at any locality for *E. panamintina*, although *B. campi*  
861 detections have declined at 5 of 14 localities for which we have resurvey data (including the  
862 three that lack detections during resurveys). Third, at localities with perhaps the most severe  
863 human impacts (Barrel Springs and CA Highway 168), repeated detection of juveniles indicates  
864 successful ongoing reproduction in these populations. As such, despite lacking comprehensive  
865 rangewide data, available information suggests that populations of both species are likely  
866 relatively stable overall, albeit with possible population declines in some *B. campi* populations  
867 for which we have resurvey data, due to recent flash floods. We thus re-evaluate both *E.*  
868 *panamintina* and *B. campi* as Near Threatened on the IUCN Red List (IUCN Red List Criteria  
869 Version 3.1), downlistings that we consider a positive development (see Mallon and Jackson  
870 [2017]).

871         Independent of their IUCN listings, we expect that the existing status of both *E.*  
872 *panamintina* and *B. campi* as CDFW Species of Special Concern and BLM Sensitive Species  
873 will motivate continued attention to their protection. Available evidence indicates that these  
874 status listings are warranted, and we suggest that they remain unchanged. We similarly advocate  
875 for the continued inclusion of *B. campi* on the INF's Species of Conservation Concern list, and  
876 strongly recommend reconsideration of the proposed exclusion of *E. panamintina* from that list  
877 (Inyo National Forest 2017b). A recent analysis of the conservation status of *E. panamintina* on

878 INF lands evaluated the species as being of “high concern” or “some concern” across all eight  
879 threat categories assessed (Evelyn and Sweet 2012). Our surveys indicate that the 12 known  
880 localities for *E. panamintina* on INF lands include some of the most at-risk populations  
881 rangewide. Half are affected by roads that bisect riparian or talus habitat, almost half are affected  
882 by ongoing water diversions, and two localities (Barrel Springs and CA Highway 168) are  
883 perhaps the most strongly human-altered of any known site. Furthermore, the localities that drain  
884 into the Owens and Chalfant valleys are among the most vulnerable to pressures from increased  
885 water diversions, due to the agricultural, ranching, and housing development in those valleys.  
886 For these reasons, we consider it imperative that *E. panamintina* be included on the INF’s  
887 Sensitive Species list, to promote continued management efforts by INF that will help forestall  
888 any need for more stringent listing status in the future.

889 All federal agencies that support populations of both *E. panamintina* and *B. campi* face  
890 challenges managing for these species in the context of multi-purpose land use and a changing  
891 political environment (Norment, in press). This reality can lead to unavoidable complexity and  
892 tradeoffs for many management actions, problems that are widely recognized among  
893 conservation practitioners (Hirsch et al. 2010; Roe and Walpole 2010; McShane et al. 2011). For  
894 instance, regional agricultural and municipal water needs are likely to increasingly conflict with  
895 those of *E. panamintina* and *B. campi*, control of feral horses and burros often contradicts deep-  
896 seated value systems held by some stakeholders, and mining-related economic development can  
897 clash with protection of sensitive riparian habitat. Furthermore, limited resources and competing  
898 goals may complicate implementation of management interventions, especially given the remote  
899 landscapes occupied by *E. panamintina* and *B. campi*. Scientific uncertainty, which we regularly  
900 identified in our threat assessment, will also necessitate adaptive management of these species

901 (Runge 2011). While recognizing these challenges, we nonetheless offer four management  
902 recommendations designed to promote the long-term population viability of both species (Figure  
903 5). Our recommendations are targeted toward preservation of sensitive riparian habitats that are  
904 critical not only to *E. panamintina* and *B. campi*, but also to co-occurring species of regulatory  
905 interest including the Inyo California towhee, *Melospiza crissalis eremophilus* (federally  
906 Threatened, state Endangered) and desert bighorn sheep, *Ovis canadensis nelsoni* (BLM  
907 Sensitive and INF Species of Conservation Concern). We hope that this alignment with broader  
908 resource protection goals will increase the relevance of our recommendations in prioritizing  
909 future conservation action. First, we recommend that existing water withdrawals on federal lands  
910 be carefully enumerated and tracked, and that any proposal to initiate new water withdrawals be  
911 vetted using a detailed environmental impact assessment. Second, we recommend the continued  
912 reduction of feral burro and horse populations on federal lands, and the drawdown of permitted  
913 animal unit months in the Hunter Mountain cattle grazing allotment within DVNP. Third, we  
914 recommend continued control of *Tamarix* spp. on federal lands using appropriate control  
915 methods, with particular emphasis on localities where *Tamarix* eradication is feasible due to low  
916 plant abundance, while considering potential impacts to native species and habitat. Fourth, we  
917 recommend that any new proposal for mineral resource extraction on federal lands be vetted  
918 using a detailed environmental impact assessment, and that any mining-related destruction or  
919 degradation of riparian zones be carefully controlled. Attention to the other threats identified in  
920 our assessment is also important for conserving *E. panamintina*, *B. campi*, and their habitats. But  
921 we argue that focusing limited available resources on the management of water withdrawals,  
922 grazing, invasive *Tamarix*, and mining will likely maximize return on investment, and minimize  
923 the need for more strict regulation to protect these species.



924 Through our status assessment and threat analysis, we also identified several research  
925 needs of immediate management relevance to both *E. panamintina* and *B. campi* (Figure 5).  
926 These include: (1) updated species distribution models, to inform targeted surveys of potential  
927 new localities and more rigorously evaluate the possibility of private-land populations; (2)  
928 rangewide GIS analysis of all riparian zones in the mountains occupied by these species, to  
929 produce a baseline assessment of habitat extent in the face of climate change; (3) comprehensive  
930 multi-day survey expeditions at suspected localities to verify and voucher species' occupancy,  
931 ground-truth current threats, and evaluate habitat quality; (4) conservation genomics of known  
932 populations, to evaluate genetic diversity and estimate rates of gene flow among and between  
933 localities; and (5) field and/or laboratory studies of the susceptibility and prevalence of  
934 chytridiomycosis in *B. campi* populations from both *Bd* and *Bsal*. Some of these research needs  
935 have been advocated elsewhere (Thomson et al. 2016). Moreover, several goals (e.g., 3 and 4)  
936 are inherently linked and can be efficiently pursued simultaneously. We especially advise field  
937 workers in the Inyo Mountains to consider both *E. panamintina* and *B. campi* in their study aims,  
938 because these species likely co-occur at most riparian zones in that range. We encourage agency  
939 funding to support research on these topics, and emphasize that the results of such studies might  
940 lead to revisions of our threat assessment. Although our recent survey coverage included the  
941 majority of the known localities for both species, gaps do exist, particularly on lands managed by  
942 DVNP and CLNAWS.

943 Species-focused recommendations aside, our work additionally revealed the presence of  
944 several recurring scholarly problems that are of general interest to the broader scientific  
945 community, given the reliance of species status assessments on the best available science. The  
946 factual errors that we identified in the literature with respect to *E. panamintina* and *B. campi* are

947 attributable to several causes, including: overlooking or selective use of available data, limited  
948 availability of some gray literature, the use of and failure to contextualize older data in light of  
949 more recent findings, misinterpretation or misrepresentation of data, and perpetuation of pre-  
950 existing literature errors. These problems are not unique, and have been identified elsewhere  
951 (Rubel and Arora 2008; Stromberg et al. 2009). In the *E. panamintina* and *B. campi* literature,  
952 the high frequency of errors could be a consequence of the relatively limited amount of data  
953 available in a peer-reviewed format, and limited accessibility of original data found only in  
954 uncirculated agency reports. For this reason, we encourage biologists and resource managers to  
955 prioritize the release of novel scientific data in a publicly accessible, peer-reviewed format  
956 whenever possible. Furthermore, we invite those who produce any scientific literature to strive  
957 for the following scholarly standards: (1) provide supporting evidence/citations for claims or  
958 statements; (2) reference original source literature, or scholarly review papers, when citing  
959 evidence for claims or statements; (3) cite references accurately, in a way that does not  
960 misrepresent the work of earlier authors; (4) cite older references with caution, and indicate  
961 when these might not reflect contemporary reality, and (5) comprehensively review the available  
962 literature on the topic of interest (Figure 3). Achieving these standards is a labor-intensive  
963 process, and no publication is ever perfect. Yet by striving to fulfill these scholarly guidelines  
964 (Figure 5), researchers will promote the best available science and help agencies tasked with  
965 resource protection to best prioritize their limited time and budgets. Furthermore, these  
966 recommendations will help to ensure that authors in any discipline will maximize the accuracy,  
967 value, and utility of their work, thereby assuring the integrity of the scientific community's  
968 "bricks."  
969

970 *Acknowledgments*.—Author order follows the “sequence-determines-credit” approach as defined  
971 by Tscharrntke et al. (2007). We thank B. Alexander, L. Bell, S. Brown, J. Calvin, T. Campbell,  
972 M. Dickes, J. Dittli, T. Hibbitts, S. Hillard, E. L. Jockusch, J. D. Hunt, C. Klingler, O. Klingler-  
973 Brown, J. Mattern, G. Milano, M. Murphy, D. Nielsen, M. T. Norment, S. P. Parker, S.  
974 Parmenter, K. Rademacher, D. Silverman, R. Smith, B. J. Thesing, D. York, and the late D.  
975 Giuliani for field assistance and data sharing. D. Pritchett at the University of California White  
976 Mountain Research Center, and C. Fidler at the University of California Berkeley Museum of  
977 Vertebrate Zoology Archives, graciously provided copies of the unpublished field notes of D.  
978 Giuliani and K. Yanev, respectively. We are grateful to N. Camacho and G. B. Pauly (LACM)  
979 for accessioning vouchers. D. J. House, M. R. Lambert, J. C. Maerz, and several members of the  
980 Maerz lab offered helpful comments on prior versions of this manuscript. D. LaBerteaux and C.  
981 Carter shared key literature. Financial support was provided through a University of Georgia  
982 Presidential Fellowship to AGC; a sabbatical leave granted to CJN by the College at Brockport,  
983 SUNY; and a contract awarded to CJN by the U.S. Fish and Wildlife Service. These funding  
984 sources had no role in influencing this research or its publication. Field work was authorized  
985 under California Department of Wildlife Scientific Collecting Permit #011663, Bureau of Land  
986 Management Permits #1110 (CA-170.31) P, #1110 (CA-6601.26) P, and #6500 (CA-170.31) P,  
987 USDA Inyo National Forest Permits #WMD15002 and #2300, USDI National Park Service  
988 Permit #DEVA-2017-SCI-0036, and University of Georgia IACUC AUP #A2012 10-004-Y1-  
989 A0, #A2016 02-001-Y1-A0, and #A2016 02-001-Y2-A0. A. Ellsworth issued a CDFW letter of  
990 authorization for survey work at the Indian Joe Springs Ecological Reserve. We dedicate this  
991 paper to the late David J. Morafka and Derham Giuliani.  
992

993 **Supplementary Material**

994

995 Table S1. Raw threat data and voucher information for all reported localities.

996

997

998

999 **References**

1000 Adkins Giese CL, Greenwald DN, Curry T. 2012. Petition to list 53 amphibians and reptiles in  
1001 the United States as threatened or endangered species under the Endangered Species Act.  
1002 Center for Biological Diversity.

1003 Animal Welfare Institute. 2012. Overview of the management of wild horses and burros. A  
1004 report presented to the National Academy of Sciences Committee to Review the  
1005 Management of Wild Horses and Burros.

1006 Anonymous. 1982. A Sikes Act management plan for the Surprise Canyon Area of Critical  
1007 Environmental Concern (CA-06-WHA-10) and Western Panamint Mountains Canyons  
1008 Wildlife Habitat Management Area (WHMA) (CA-06-WHA-10).

1009 Anonymous. 2017. Neutral citation is poor scholarship. *Nature Genetics* 49:1559.

1010 Banta BH. 1963. Remarks upon the natural history of *Gerrhonotus panamintinus* Stebbins.  
1011 Occasional Papers of the California Academy of Sciences 36:1–12.

1012 Banta BH. 1965. A distributional check list of the recent reptiles inhabiting the State of Nevada.  
1013 Biological Society of Nevada Occasional Papers 5:1–8.

1014 Banta BH, Mahrtdt CR, Beaman KR. 1996. *Elgaria panamintina* (Stebbins) Panamint alligator  
1015 lizard. *Catalogue of American Amphibians and Reptiles* 629:1–4.

- 1016 Bateman HL, Paxton EH, Longland WS. 2013. *Tamarix* as wildlife habitat. Pages 168–188 in  
1017 Sher A, Quigley MF, editors. *Tamarix: A case study of ecological change in the*  
1018 *American West*. New York, New York: Oxford University Press.
- 1019 Bauer S, Olson J, Cockrill A, van Hattem M, Miller L, Tauzer M, Leppig G. 2015. Impacts of  
1020 surface water diversions for marijuana cultivation on aquatic habitat in four Northwestern  
1021 California watersheds. *PloS One* 10:1–25.
- 1022 Beaty CB. 1963. Origin of alluvial fans, White Mountains, California and Nevada. *Annals of*  
1023 *the Association of American Geographers* 53:516–535.
- 1024 Bedinger MS, Harrill JR. 2012. Groundwater geology and hydrology of Death Valley National  
1025 Park, California and Nevada. Fort Collins, Colorado: National Park Service. Natural  
1026 Resource Technical Report NPS/NRSS/WRD/NRTR—2012/652.
- 1027 Behler JL, King FW. 1979. National Audubon Society® Field Guide to North American Reptiles  
1028 and Amphibians. New York: Alfred A. Knopf, Inc.
- 1029 [BLM] Bureau of Land Management. 2001. Closure order for motorized vehicle use, Surprise  
1030 Canyon Area of Critical Environmental Concern BLM Route P71, Panamint Mountains,  
1031 Inyo County, CA. *Federal Register* 66:29163–29164.
- 1032 [BLM] Bureau of Land Management. 2012. Haiwee geothermal leasing area draft environmental  
1033 impact statement and draft proposed amendment to the California Desert Conservation  
1034 Area Plan. Department of the Interior No. 12-6.
- 1035 Butsic V, Brenner JC. 2016. Cannabis (*Cannabis sativa* or *C. indica*) agriculture and the  
1036 environment: a systematic, spatially-explicit survey and potential impacts. *Environmental*  
1037 *Research Letters* 11:1–10.
- 1038 California Senate Bill No. 2, chapter 1, 1–44. 2011. <http://www.leginfo.ca.gov/pub/11>

- 1039 12/bill/sen/sb\_0001-0050/sbx1\_2\_bill\_20110412\_chaptered.pdf.
- 1040 Caviedes-Solis IW, Vázquez-Vega LF, Solano-Zavaleta I, Pérez-Ramos E, Rovito SM, Devitt  
1041 TJ, Heimes P, Flores-Villela OA, Campbell JA, Nieto Montes de Oca A. 2015.  
1042 Everything is not lost: recent records, rediscoveries, and range extensions of Mexican  
1043 hylid frogs. *Mesoamerican Herpetology* 2:230–241.
- 1044 Cheng TL, Rovito SM, Wake DB, Vredenburg VT. 2011. Coincident mass extirpation of  
1045 neotropical amphibians with the emergence of the infectious fungal pathogen  
1046 *Batrachochytrium dendrobatidis*. *Proceedings of the National Academy of Sciences of*  
1047 *the United States of America* 108:9502–9507.
- 1048 Clause AG, Erdman J, Buckmaster NG, Tuday C, Hubeek N, Clause JK. 2014. Geographic  
1049 distribution. *Batrachoseps campi* (Inyo Mountains salamander). *Herpetological Review*  
1050 45:273–274.
- 1051 Clause AG, Thomas-Moko N, Rasalato S, Fisher RN. 2018. All is not lost: herpetofaunal  
1052 “extinctions” in the Fiji Islands. *Pacific Science* 72:IN PRESS.
- 1053 Cleverly JR. 2013. Water Use by *Tamarix*. Pages 85–98 in Sher A, Quigley MF, editors.  
1054 *Tamarix: A Case Study of Ecological Change in the American West*. New York, New  
1055 York: Oxford University Press.
- 1056 California Energy Commission. 2014. DRAFT Desert Renewable Energy Conservation Plan  
1057 (DRECP). Executive Summary. <http://drepc.org/draftdrepc>.
- 1058 Cook BI, Ault TR, Smerdon JE. 2015. Unprecedented 21st Century drought risk in the  
1059 American Southwest and Central Plains. *Science Advances* 1:1–7.
- 1060 Courchamp F, Bradshaw CJA. 2017. 100 articles every ecologist should read. *Nature Ecology*  
1061 *and Evolution*. DOI: 10.1038/s41559-017-0370-9

- 1062 Crowley SL, Hinchliffe S, McDonald RA. 2017. Conflict in invasive species management.  
1063           Frontiers in Ecology and the Environment 15:133–141.
- 1064 Cunningham L, Emmerich K. 2001. Panamint alligator lizard (*Elgaria panamintina*) pilot  
1065           study: preliminary report on the multidisciplinary first assessment of the environmental  
1066           status of the Panamint alligator lizard. Report to David J. Morafka (CSU Dominguez  
1067           Hills) and Steve Parmenter (California Department of Fish and Game). Reference R1.
- 1068 DeDecker M. 1991. Shrubs and flowering plants. Pages 108–241 in Hall Jr, CA., editor. Natural  
1069           history of the White-Inyo Range, Eastern California. Berkeley and Los Angeles,  
1070           California: University of California Press.
- 1071 DeLorme. 2015. California Atlas & Gazetteer. Canada.
- 1072 Di Tomaso JM. 1998. Impact, biology, and ecology of saltcedar (*Tamarix* spp.) in the  
1073           southwestern United States. Weed Technology 12:326–336.
- 1074 Dixon JD. 1975. Geographic distribution. *Gerrhonotus panamintinus* (Panamint alligator  
1075           lizard). Herpetological Review 6:45.
- 1076 Dubois A, Nemésio A. 2007. Does nomenclatural availability of nomina of new species or  
1077           subspecies require the deposition of vouchers in collections? Zootaxa 1409:1–22.
- 1078 Elmore AJ, Mustard JF, Manning SJ. 2003. Regional patterns of plant community response to  
1079           changes in water: Owens Valley, California. Ecological Applications 13:443–460.
- 1080 [ESA] US Endangered Species Act of 1973, as amended, Pub. L. No. 93-205, 87 Stat. 884 (Dec.  
1081           28, 1973). Available at: <http://www.fws.gov/endangered/esa-library/pdf/ESAall.pdf>.
- 1082 Evelyn CJ, Sweet SS. 2012. Conservation status of amphibians and reptiles on USDA National

- 1083 Forests, Pacific Southwest Region, 2012. Report prepared for USDA Forest Service,  
1084 Region 5, Pacific Southwest Region, Patricia A. Kreuger (contact). Funded by 2010-CS-  
1085 11052007-113.
- 1086 Inyo National Forest. 2017a. Proposed action. Robbie Hoyt Memorial Mine-project plan of  
1087 operations. White Mountain Ranger District – Inyo National Forest
- 1088 Inyo National Forest. 2017b. Rationales for animal species considered for Species of  
1089 Conservation Concern. Draft prepared by Wildlife Biologists and Natural Resources  
1090 Specialists Regional Office, Inyo National Forest and Washington Office Enterprise  
1091 Program.
- 1092 Forscher BK. 1963. Chaos in the brickyard. *Science* 142:339.
- 1093 Giuliani DD. 1977. Inventory of habitat and potential habitat for *Batrachoseps* sp. Contract  
1094 number CA-010-PH6-805. USDI Bureau of Land Management, Bakersfield District  
1095 Office, Bakersfield, California. Reference R2.
- 1096 Giuliani DD. 1988. Eastern Sierra Nevada salamander survey. Draft report. Contract No. FG  
1097 7533 for California Department of Fish and Game. Reference R3.
- 1098 Giuliani DD. 1990. New salamander populations from the Eastern Sierra Nevada and Owens  
1099 Valley Region of California with notes on previously known sites. Final report for  
1100 California Department of Fish and Game Contracts FG7533 and FG8450. Reference R4.
- 1101 Giuliani DD. 1993. Field survey for selected sensitive species of amphibians and reptiles on  
1102 the China Lake Naval Air Weapons Station. Prepared for Naval Air Weapons Station,  
1103 Environmental Project Office, China Lake, California 93555-6001. Reference R5.
- 1104 Giuliani DD. 1996. Resurvey of Eastern Sierra Nevada salamanders. Final report. Reference R6.
- 1105 Grieneisen ML, Zhang M. 2012. A comprehensive survey of retracted articles from scholarly



- 1106 literature. PloS One 7:1–15.
- 1107 Grismer LL. 1988. Geographic variation, taxonomy, and biogeography of the anguid genus  
1108 *Elgaria* (Reptilia: Squamata) in Baja California, Mexico. Herpetologica 44:431–439.
- 1109 Grismer LL, Hollingsworth BD. 2001. A taxonomic review of the endemic alligator lizard  
1110 *Elgaria paucicarinata* (Anguidae: Squamata) of Baja California, Mexico with a  
1111 description of a new species. Herpetologica 57:488–496.
- 1112 Grismer LL, McGuire JA. 1993. The oases of Central Baja California, México. Part I. A  
1113 preliminary account of the relict mesophilic herpetofauna and the status of the oases.  
1114 Bulletin of the Southern California Academy of Sciences 92:2–24.
- 1115 Hammerson GA. 2004a. *Batrachoseps campi*. The IUCN Red List of Threatened Species 2004:  
1116 e.T2649A9465354. Available:  
1117 <http://dx.doi.org/10.2305/IUCN.UK.2004.RLTS.T2649A9465354.en>. (January 2014).
- 1118 Hammerson GA. 2004b. *Batrachoseps campi*. NatureServe 2013. NatureServe Explorer: An  
1119 Online Encyclopedia of Life. Version 7.1. NatureServe, Arlington, Virginia.  
1120 [www.natureserve.org/explorer](http://www.natureserve.org/explorer) (January 2014).
- 1121 Hammerson GA. 2007. *Elgaria panamintina*. The IUCN Red List of Threatened Species 2007:  
1122 e.T40792A10355592.  
1123 <http://dx.doi.org/10.2305/IUCN.UK.2007.RLTS.T40792A10355592.en> (January 2014).
- 1124 Hammerson GA, Macey JR, Papenfuss TJ. 2005. *Elgaria panamintina*. NatureServe 2013.  
1125 NatureServe Explorer: An Online Encyclopedia of Life. Version 7.1. NatureServe,  
1126 Arlington, Virginia. [www.natureserve.org/explorer](http://www.natureserve.org/explorer) (January 2014).
- 1127 Hansen RW, Wake DB. 2005. *Batrachoseps campi* Marlow, Brode, and Wake, 1979 Inyo

- 1128 Mountains salamander. Pages 669–671 in Lannoo M, editor. Amphibian declines: the  
1129 conservation status of United States species. Berkeley and Los Angeles, California:  
1130 University of California Press.
- 1131 Hirsch PD, Adams WM, Brosius JP, Zia A, Bariola N, Dammert JL. 2010. Acknowledging  
1132 conservation trade-offs and embracing complexity. *Conservation Biology* 25:259–264.
- 1133 Hope, AG, Sandercock BK, Malaney JL. 2018. Collection of scientific specimens: benefits for  
1134 biodiversity sciences and limited impacts on communities of small mammals. *Bioscience*  
1135 68:35–42.
- 1136 Jennings MR, Hayes MP. 1994. Amphibian and reptile Species of Special Concern in  
1137 California. Final report submitted to the California Department of Fish and Game Inland  
1138 Fisheries Division 1701 Nimbus Road Rancho Cordova, CA 95701 under Contract  
1139 Number 8023.
- 1140 Jockusch EL. 2001. *Batrachoseps campi* Marlow, Brode, and Wake: Inyo Mountains slender  
1141 salamander. *Catalogue of American Amphibians and Reptiles* 722:1–2.
- 1142 Jockusch EL, Martínez-Solano I, Timpe EK. 2015. The effects of inference method, population  
1143 sampling, and gene sampling on species tree inferences: an empirical study in slender  
1144 salamanders (Plethodontidae: *Batrachoseps*). *Systematic Biology* 64:66–83.
- 1145 Jones BF. 1965. The hydrology and mineralogy of Deep Springs Lake Inyo County, California.  
1146 Closed-Basin Investigations. Geological Survey Professional Paper 502. US Department  
1147 of the Interior, Washington, D.C.: United States Government Printing Office.
- 1148 Jones KB. 1981. Effects of grazing on lizard abundance and diversity in western Arizona. *The*  
1149 *Southwestern Naturalist* 26:107–115.
- 1150 Kauffman JB, Krueger WC. 1984. Livestock impacts on riparian ecosystems and streamside

- 1151 management implications...a review. *Journal of Range Management* 37:430–438.
- 1152 Kauffman MJ, Brodie JF, Jules ES. 2010. Are wolves saving Yellowstone’s aspen? A  
1153 landscape-level test of a behaviorally mediated trophic cascade. *Ecology* 91:2742–2755.
- 1154 Klingler C. 2015. Comments on FWS-R8-ES-2015-0105 (90-day finding on a petition to list  
1155 the Panamint alligator lizard, *Elgaria panamintina*, as a Threatened or Endangered  
1156 Species under the Act).
- 1157 Knopf A. 1912. Mineral resources of the Inyo and White Mountains, California. *Contributions*  
1158 to *Economic Geology* 540:81–120.
- 1159 Krell F-T, Wheeler QD. 2014. Specimen collection: plan for the future. *Science* 344:815–816.
- 1160 LaBerteaux DL, Garlinger BH. 1998. Inyo California towhee (*Pipilo crissalis eremophilus*)  
1161 census in the Argus and Coso Mountain Ranges, Inyo County, California. Prepared for  
1162 Commanding Officer (83E000D) Naval Air Weapons Station. Contract N62474-98-M-  
1163 3113. EREMICO Biological Services, Onyx, California. Reference R7.
- 1164 Ladle RJ, Jepson P, Jennings S, Malhado ACM. 2009. Caution with claims that a species has  
1165 been rediscovered. *Nature* 461:723.
- 1166 Ladle RJ, Jepson P, Malhado ACM, Jennings S, Barua M. 2011. The causes and biogeographical  
1167 significance of species’ rediscovery. *Frontiers of Biogeography* 3:111–118.
- 1168 LaMarche Jr. VC. 1973. Holocene climatic variations inferred from treeline fluctuations in the  
1169 White Mountains, California. *Quaternary Research* 3:632–660.
- 1170 Larson A, Wake DB, Yanev KP. 1984. Measuring gene flow among populations having high  
1171 levels of genetic fragmentation. *Genetics* 106:293–308.
- 1172 Leavitt DH, Marion AB, Hollingsworth BD, Reeder TW. 2017. Multilocus phylogeny of

- 1173 alligator lizards (*Elgaria*, Anguillidae): testing mtDNA introgression as the source of  
1174 discordant molecular phylogenetic hypotheses. *Molecular Phylogenetics and Evolution*  
1175 110:104–121.
- 1176 Legal Information Institute. Undated. 16 U.S. Code § 1133. Use of wilderness areas. Available at  
1177 <https://www.law.cornell.edu/uscode/text/16/1133>. Cornell University Law School.
- 1178 Lowell N, Kelly RP. 2016. Evaluating agency use of “best available science” under the United  
1179 States Endangered Species Act. *Biological Conservation* 196:53–59.
- 1180 Lytle, DA. 1999. Use of rainfall cues by *Abedus herberti* (Hemiptera: Belostomatidae): a  
1181 mechanism for avoiding flash floods. *Journal of Insect Behavior* 12:1–12.
- 1182 MacDonald GM, Moser KA, Bloom AM, Potito AP, Porinchu DF, Holmquist JR, Hughs J,  
1183 Kremenetski KV. 2016. Prolonged California aridity linked to climate warming and Pacific sea  
1184 surface temperature. *Scientific Reports* 6:1–8.
- 1185 Macey JR, Papenfuss TJ. 1991a. Amphibians. Pages 277–290 in Hall Jr. CA, editor. *Natural*  
1186 *history of the White-Inyo Range, Eastern California*. Berkeley and Los Angeles,  
1187 California: University of California Press.
- 1188 Macey JR, Papenfuss TJ. 1991b. Reptiles. Pages 291–360 in Hall Jr. CA, editor. *Natural*  
1189 *history of the White-Inyo Range, Eastern California*. Berkeley and Los Angeles,  
1190 California: University of California Press.
- 1191 Mahrtdt CR, Beaman KR. 2002. Panamint alligator lizard, *Elgaria panamintina*. Species account  
1192 for the West Mojave Management Plan, Riverside, California. Reference R8.
- 1193 Mahrtdt CR, Beaman KR. 2009. Panamint alligator lizard *Elgaria panamintina* (Stebbins, 1958).  
1194 Pages 488–491 in Jones LLC, Lovich RE, editors. *Lizards of the American Southwest: a*  
1195 *photographic field guide*. Tucson, Arizona: Rio Nuevo Publishers.

- 1196 Mallon DP, Jackson RM. 2017. A downlist is not a demotion: Red List status and reality. *Oryx*  
1197 51:605–609.
- 1198 Manzanar Committee. 2015. Unified, grass-roots effort credited with gaining indefinite hold  
1199 on industrial-scale solar projects threatening Manzanar, Owens Valley. Press release.
- 1200 Marlow RW, Brode JM, Wake DB. 1979. A new salamander, genus *Batrachoseps*, from the Inyo  
1201 Mountains of California, with a discussion of relationships in the genus. *Contributions in*  
1202 *Science Natural History Museum of Los Angeles County* 308:1–17.
- 1203 Marris E. 2014. Legend of the wolf. *Nature* 507:158–160.
- 1204 Marshall KN, Hobbs NT, Cooper DJ. 2013. Stream hydrology limits recovery of riparian  
1205 ecosystems after wolf reintroduction. *Proceedings of the Royal Society B* 280:1–7.
- 1206 Martel A, Spitzen-van der Sluijs A, Blooi M, Bert W, Ducatelle R, Fisher MC, Woeltjes A,  
1207 Bosman W, Chiers K, Bossuyt F, Pasmans F. 2013. *Batrachochytrium salamandrivorans*  
1208 sp. nov. causes lethal chytridiomycosis in amphibians. *Proceedings of the National*  
1209 *Academy of Sciences of the United States of America* 110:15325–15329.
- 1210 McKee EH, Kilburn JE, McCarthy Jr. JH, Conrad JE, Blakely RJ, Close TJ. 1985. Mineral  
1211 resources of the Inyo Mountains Wilderness Study Area, Inyo County, California. *United*  
1212 *States Geological Survey Bulletin* 1708-A. Alexandria, VA: U.S. Geological Survey.
- 1213 McShane TO, Hirsch PD, Trung TC, Songorwa AN, Kinzig A, Monteferri B, Mutekanga D,  
1214 Thang HV, Dammert JL, Pulgar-Vidal M, et al. 2011. Hard choices: making trade-offs  
1215 between biodiversity conservation and human well-being. *Biological Conservation*  
1216 144:966–972.
- 1217 Mendoza-Almeralla C, López-Velázquez A, Longo AV, Parra-Olea G. 2016. Temperature

- 1218 treatments boost subclinical infections of *Batrachochytrium dendrobatidis* in a Mexican  
1219 salamander (*Pseudoeurycea leprosa*). *Revista Mexicana de Biodiversidad* 87:171–179.
- 1220 Michael Brandman Associates, Inc. 1988. Field survey for selected sensitive species of  
1221 amphibians and reptiles on the China Lake Naval Weapons Center. Report to Jerry R.  
1222 Boggs, China Lake Naval Weapons Center, Environmental Resources Management  
1223 Branch (Code 2662), China Lake, California 93555-6001. Reference R9.
- 1224 Modrick TM, Georgakakos KP. 2015. The character and causes of flash flood occurrence  
1225 changes in mountainous small basins of Southern California under projected climatic  
1226 change. *Journal of Hydrology: Regional Studies* 3:312–336.
- 1227 Moffitt D, Williams LA, Hastings A, Pugh MW, Gangloff MM, Siefferman L. 2015. Low  
1228 prevalence of the amphibian pathogen *Batrachochytrium dendrobatidis* in the Southern  
1229 Appalachian Mountains. *Herpetological Conservation and Biology* 10:123–136.
- 1230 Morafka DJ, Emmerich K, Cunningham L. 2001. Preliminary annual report Panamint alligator  
1231 lizard (*Elgaria panamintina*) environmental assessment of species at risk, sponsored by  
1232 the United States Geological Survey.
- 1233 Morrison ML, Hall LS. 1999. Habitat relationships of amphibians and reptiles in the Inyo-White  
1234 Mountains, California and Nevada. *USDA Forest Service Proceedings RMRS-P-9:233–*  
1235 *237*.
- 1236 Murphy DD, Weiland PS. 2016. Guidance on the use of best available science under the U.S.  
1237 Endangered Species Act. *Environmental Management* 58:1–14.
- 1238 Nagler PL, Glenn EP. 2013. Tamarisk: ecohydrology of a successful plant. Pages 63–84 in Sher  
1239 A, Quigley MF, editors. *Tamarix: a case study of ecological change in the American*  
1240 *West*. New York, New York: Oxford University Press.

- 1241 National Park Service. 2002. Death Valley National Park General Management Plan.
- 1242 Norment, C.J. Politics, imagination, ideology, and the realms of our possible futures. Chapter 24  
1243 in Probst D, Williams JE, Bestgen KR, and Hoagstrom CW, editors. Standing against  
1244 extinction: ethics and ecology of conserving aquatic species in the American Southwest  
1245 University of Chicago Press (in press).
- 1246 Ohrtman MK, Lair KD. 2013. *Tamarix* and salinity: an overview. Pages 123–145 in Sher A,  
1247 Quigley MF, editors. *Tamarix*: a case study of ecological change in the American West.  
1248 New York, New York: Oxford University Press.
- 1249 Papenfuss TJ, Macey JR. 1986. A review of the population status of the Inyo Mountains  
1250 salamander (*Batrachoseps campi*). Final report, order number 10188-5671-5, U. S. Fish  
1251 and Wildlife Service, Endangered Species Office, Sacramento, California. Reference  
1252 R10.
- 1253 Pascale S, Boos WR, Bordoni S, Delworth TL, Kapnick SB, Murakami H, Vecchi GA, Zhang  
1254 W. 2017. Weakening of the North American monsoon with global warming. *Nature*  
1255 *Climate Change* 7:806–813.
- 1256 Patchick PF. 1964. Springs of the Argus Mountains, California and their use in a desert  
1257 community. *International Association of Scientific Hydrology. Bulletin* 9:46–55.
- 1258 Perry G. 2016. Herpetological ethics. *Journal of Herpetology* 50:345–346.
- 1259 Petersen CE, Lovich RE, Stallings SA. 2017. Amphibian and reptile biodiversity on United  
1260 States Department of Defense installations. Final Report.
- 1261 Phillips Brandt Reddick, Inc. 1983. Riparian habitat resources inventory. Prepared for  
1262 Department of the Navy, Naval Weapons Center, China Lake, California. Reference R11.

- 1263 Poe S, Armijo B. 2014. Lack of effect of herpetological collecting on the population structure of  
1264 a community of *Anolis* (Squamata: Dactyloidae) in a disturbed habitat. *Herpetology*  
1265 *Notes* 7:153–157.
- 1266 Polade SD, Gershunov A, Cayan DR, Dettinger MD, Pierce DW. 2017. Precipitation in a  
1267 warming world: assessing projected hydro-climate changes in California and other  
1268 Mediterranean climate regions. *Scientific Reports* 7:1–10.
- 1269 Pullin AS, Knight TM. 2009. Doing more good than harm—building an evidence-base for  
1270 conservation and environmental management. *Biological Conservation* 142:931–934.
- 1271 Ricciardi A, Ryan R. 2017. The exponential growth of invasive species denialism. *Biological*  
1272 *Invasions* 20:549–553.
- 1273 Richgels KLD, Russell RE, Adams MJ, White CL, Grant EHC. 2016. Spatial variation in risk  
1274 and consequence of *Batrachochytrium salamandrivorans* introduction in the USA. *Royal*  
1275 *Society Open Science* 3:150616.
- 1276 Riensche DL. 2008. Effect of cattle grazing on lizard diversity in managed Central California  
1277 grasslands. *Transactions of the Western Section of the Wildlife Society* 44:4–10.
- 1278 Roberts DL, Elphick CS, Reed JM. 2010. Identifying anomalous reports of putatively extinct  
1279 species and why it matters. *Conservation Biology* 24:189–196.
- 1280 Rocha LA, Aleixo A, Allen G, Almeda F, Baldwin CC, Barclay MVL, Bates JM, Bauer AM,  
1281 Benzoni F, Berns CM, et al. 2014. Specimen collection: an essential tool. *Science*  
1282 344:814–815.
- 1283 Roe D, Walpole MJ. 2010. Whose value counts? Trade-offs between biodiversity conservation  
1284 and poverty reduction. Pages 157–174 in Leader-Williams N, Adams WM, Smith RJ,  
1285 editors. *Trade-offs in conservation: deciding what to save*. Oxford, UK: Wiley-Blackwell.



- 1286 Rubel W, Arora D. 2008. A study of cultural bias in field guide determinations of mushroom  
1287 edibility using the iconic mushroom, *Amanita muscaria*, as an example. Economic  
1288 Botany 62:223–243.
- 1289 Runge MC. 2011. An introduction to adaptive management for threatened and endangered  
1290 species. Journal of Fish and Wildlife Management 2:220–233.
- 1291 Salzberg A. 1996. Herpetofauna in the wildlife trade and nature: on the difficulty of estimation.  
1292 Amphibian & Reptile Conservation 1:24–26.
- 1293 Sanchez PG. 1974. Impact of feral burros on the Death Valley ecosystem. Cal-Neva Wildlife  
1294 10:21–34.
- 1295 Scheffers BR, Yong DL, Harris JBC, Giam X, Sodhi NS. 2011. The world’s rediscovered  
1296 species: back from the brink? PloS One 6:e22531.
- 1297 Schlaepfer MA, Hoover C, Dodd Jr. CK. 2005. Challenges in evaluating the impact of the trade  
1298 in amphibians and reptiles on wild populations. Bioscience 55:256–264.
- 1299 Sette CM, Vredenburg VT, Zink AG. 2015. Reconstructing historical and contemporary disease  
1300 dynamics: a case study using the California slender salamander. Biological Conservation  
1301 192:20–29.
- 1302 Shen X-X, Liang D, Chen M-Y, Mao RL, Wake DB, Zhang P. 2016. Enlarged  
1303 multilocus data set provides surprisingly younger time of origin for the Plethodontidae,  
1304 the largest Family of salamanders. Systematic Biology 65:66–81.
- 1305 Silver Standard Resources, Inc. 2016. Silver Standard signs option agreement to explore Perdido  
1306 project. Press release.
- 1307 Sinervo B, Méndez de la Cruz F, Miles DB, Heulin B, Bastiaans E, Villagrán-Santa Cruz M,  
1308 Lara-Resendiz R, Martínez-Méndez N, Calderón-Espinosa ML, Meza-Lázaro RN,

- 1309 Gadsden H, Javier Avila L, Morando M, De la Riva IJ, Victoriano Sepulveda P, Duarte  
1310 Rocha CF, Ibargüengoytía N, Aguilar Puntriano C, Massot M, Lepetz V, Oksanen TA,  
1311 Chapple DG, Bauer AM, Branch WR, Clobert J, Sites Jr JW. 2010. Erosion of lizard  
1312 diversity by climate change and altered thermal niches. *Science* 328:894–899.
- 1313 Sinervo B, Lara Reséndiz RA, Miles DB, Lovich JE, Ennen JR, Müller J, Cooper RD, Rosen PC,  
1314 Stewart JAE, Santos JC, Sites Jr. JW, Vaughn M, Meléndez Torres C, Gadsden, H.  
1315 Castañeda Gaytán G, Galina Tessaro P, Valle Jiménez FI, Valdez Villavencio J, Martínez  
1316 Méndez N, Woolrich Piña G, Luján Molina V, Díaz de la Vega Pérez A, Arenas Moreno  
1317 DM, Domínguez Guerrero S, Fierro N, Butterfield S, Westpha M, Huey RB, Mautz W,  
1318 Sánchez Cordero V, Méndez de la Cruz, FR. 2017. Climate change and collapsing thermal  
1319 niches of Mexican endemic reptiles. White Paper for the Environmental Working Group of  
1320 the UC-Mexico Initiative.
- 1321 Stebbins RC. 1958. A new alligator lizard from the Panamint Mountains, Inyo County,  
1322 California. *American Museum Novitates* 1883:1–27.
- 1323 Stebbins RC. 1985. *A field guide to Western reptiles and amphibians*. 2nd edition. Boston,  
1324 Massachusetts: Houghton Mifflin Company.
- 1325 Stebbins RC. 2003. *A field guide to Western reptiles and amphibians*. 3rd edition. Boston,  
1326 Massachusetts: Houghton Mifflin Company.
- 1327 Stebbins RC, McGinnis SM. 2012. *Field guide to amphibians and reptiles of California*. Revised  
1328 edition. Berkeley and Los Angeles, California: University of California Press.
- 1329 Stromberg JC, Chew MK, Nagler PL, Glenn EP. 2009. Changing perceptions of change: the role  
1330 of scientists in *Tamarix* and river management. *Restoration Ecology* 17:177–186.
- 1331 Sutherland WJ, Pullin AS, Dolman PM, Knight TM. 2004. The need for evidence-based

- 1332 conservation. *Trends in Ecology and Evolution* 19:305–308.
- 1333 Swain, DL, Langenbrunner B, Neelin JD, Hall A. 2018. Increasing precipitation  
1334 volatility in twenty-first-century California. *Nature Climate Change* 1–10  
1335 doi://10.1038/s41558-018-0140-y.
- 1336 Thomson RC, Wright AN, Shaffer HB. 2016. California amphibian and reptile Species of  
1337 Special Concern. Oakland, California: University of California Press.
- 1338 Timberline Resources Corporation. 2008. Timberline discusses recent corporate developments,  
1339 its future plans, and announces investor conference call. Press release.
- 1340 Tschardt T, Hochberg ME, Rand TA, Resh VH, Krauss J. 2007. Author sequence and credit  
1341 for contributions in multi-authored publications. *PLoS Biology* 5:13–14.
- 1342 [USFWS] United States Fish and Wildlife Service. 2015a. Endangered and threatened wildlife  
1343 and plants; 90-day findings on 10 petitions. *Federal Register* 80:19259–19263.
- 1344 [USFWS] United States Fish and Wildlife Service. 2015b. Endangered and threatened wildlife  
1345 and plants; 90-day findings on 31 petitions. *Federal Register* 80:37568–37579.
- 1346 [USFWS] United States Fish and Wildlife Service. 2015c. Endangered and threatened wildlife  
1347 and plants; 90-day findings on 25 petitions. *Federal Register* 80:56423–56432.
- 1348 [USFWS] United States Fish and Wildlife Service. 2016a. Endangered and threatened wildlife  
1349 and plants; 90-day findings on 17 petitions. *Federal Register* 81:1368–1375.
- 1350 [USFWS] United States Fish and Wildlife Service. 2016b. Endangered and threatened wildlife  
1351 and plants; 90-day findings on 29 petitions. *Federal Register* 81:14058–14072.
- 1352 [USFWS] United States Fish and Wildlife Service. 2016c. Endangered and threatened wildlife  
1353 and plants; 90-day findings on 10 petitions. *Federal Register* 81:63160–63165.
- 1354 [USFWS et al.] United States Fish and Wildlife Service, National Marine Fisheries Service,

- 1355 National Oceanic and Atmospheric Administration. 2016. Endangered and threatened  
1356 wildlife and plants; revisions to the regulations for petitions. Final rule. Federal Register  
1357 81:66462–66486.
- 1358 United States Navy and Bureau of Land Management. 2005. Comprehensive land use  
1359 management plan (CLUMP) for Naval Air Weapons Station China Lake, California.
- 1360 Van Rooij P, Martel A, Nerz J, Voitel S, Van Immerseel F, Haesebrouck F, Pasmans F. 2011.  
1361 Detection of *Batrachochytrium dendrobatidis* in Mexican bolitoglossine salamanders  
1362 using an optimal sampling protocol. *EcoHealth* 8:237–243.
- 1363 Weaver RA. 1974. Feral burro in California. *Cal-Neva Wildlife* 10:67–76.
- 1364 Weinstein SB. 2009. An aquatic disease on a terrestrial salamander: individual and population  
1365 level effects of the amphibian chytrid fungus, *Batrachochytrium dendrobatidis*, on  
1366 *Batrachoseps attenuatus* (Plethodontidae). *Copeia* 2009:653–660.
- 1367 Woodward S, McDonald J. 1979 [1980]. Report V. Survey of large mammals in the Coso  
1368 geothermal study area. Field ecology technical report on the Coso geothermal study area,  
1369 in support of Coso geothermal development environmental statement. Contract No. YA-  
1370 512-CT8-216. Reference R12.
- 1371 Wright AN, Hijmans RJ, Schwartz MW, Shaffer HB. 2013. California amphibian and reptile  
1372 species of future concern: conservation and climate change. Final report to the California  
1373 Department of Fish and Wildlife, Nongame Wildlife Program, Task 12, Contract No.  
1374 P0685904.
- 1375 Wright AN, Schwartz MW, Hijmans RJ, Shaffer HB. 2016. Advances in climate models from  
1376 CMIP3 to CMIP5 do not change predictions of future habitat suitability for California  
1377 reptiles and amphibians. *Climatic Change* 134:579–591.

- 1378 Yanev KP, Wake DB. 1981. Genic differentiation in a relict desert salamander, *Batrachoseps*  
1379 *campi*. Herpetologica 37:16–28.
- 1380 Yap TA, Gillespie L, Ellison S, Flechas SV, Koo MS, Martinez AE, Vredenburg VT. 2016.  
1381 Invasion of the fungal pathogen *Batrachochytrium dendrobatidis* on California Islands.  
1382 EcoHealth 13:145–150.
- 1383 Yap TA, Koo MS, Ambrose RF, Wake DB, Vredenburg VT. 2015. Averting a North American  
1384 biodiversity crisis. Science 349:481–482.
- 1385 Yap TA, Nguyen NT, Serr M, Shepack A, Vredenburg VT. 2017. *Batrachochytrium*  
1386 *salamandrivorans* and the risk of a second amphibian pandemic. EcoHealth 14:851–864.  
1387  
1388  
1389  
1390  
1391  
1392  
1393  
1394  
1395  
1396  
1397  
1398  
1399  
1400

1401

## Table and Figure Captions

1402

1403 Table 1. Rangewide threat scores for *Elgaria panamintina* and *Batrachoseps campi*. Score values

1404 correspond to the percentage of occupied localities currently known to be affected by the threat,

1405 as follows: 0 = 0%, 1 = less than 20%, 2 = 20–50%, 3 = over 50%. Scores marked with an

1406 asterisk (\*) denote a prediction for the future; their current score is 0.

| Threat                                    | USFWS<br>ESA Listing Factor | <i>Elgaria panamintina</i><br>Score | <i>Batrachoseps campi</i><br>Score |
|-------------------------------------------|-----------------------------|-------------------------------------|------------------------------------|
| Water diversions                          | Factor A                    | 2                                   | 0                                  |
| Grazing by<br>feral/domestic<br>livestock | Factor A                    | 2                                   | 0                                  |
| Mining                                    | Factor A                    | 0                                   | 1                                  |
| Roads and off-<br>highway vehicles        | Factor A                    | 2                                   | 0                                  |
| Invasive plants<br>( <i>Tamarix</i> spp.) | Factor A                    | 1                                   | 2                                  |
| Marijuana cultivation                     | Factor A                    | 1                                   | 1                                  |
| Renewable energy<br>development           | Factor A                    | 0                                   | 0                                  |
| Overutilization                           | Factor B                    | 0                                   | 0                                  |
| Disease                                   | Factor C                    | 0                                   | 0                                  |
| Inadequate<br>regulatory<br>mechanisms    | Factor D                    | 0                                   | 0                                  |
| Climate change                            | Factor E                    | 3*                                  | 3*                                 |
| Flash floods                              | Factor E                    | 1                                   | 2                                  |

1407

1408

1409

1410

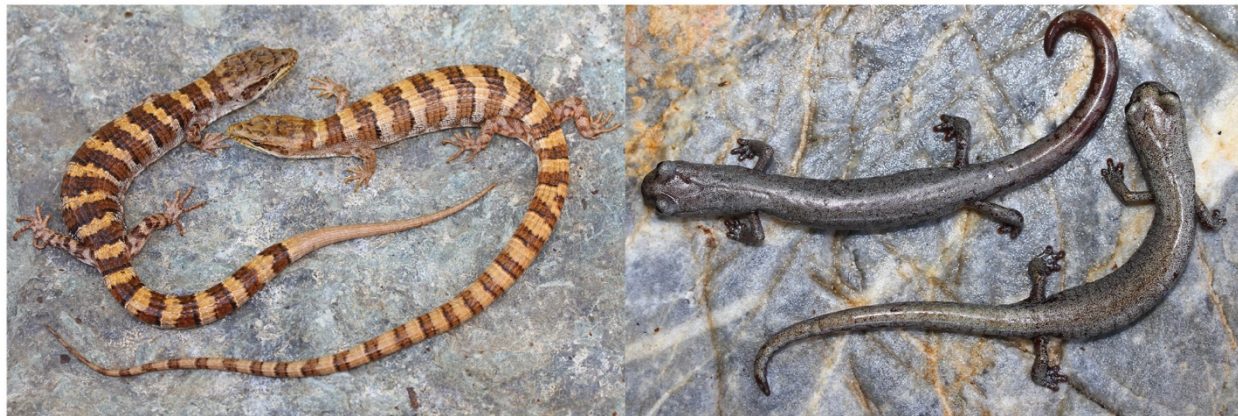

1411

1412 Figure 1. Panamint alligator lizard, *Elgaria panamintina* (left), and Inyo Mountains Salamander,

1413 *Batrachoseps campi* (right). Photographs by Adam G. Clause.

1414

1415

1416

1417

1418

1419

1420

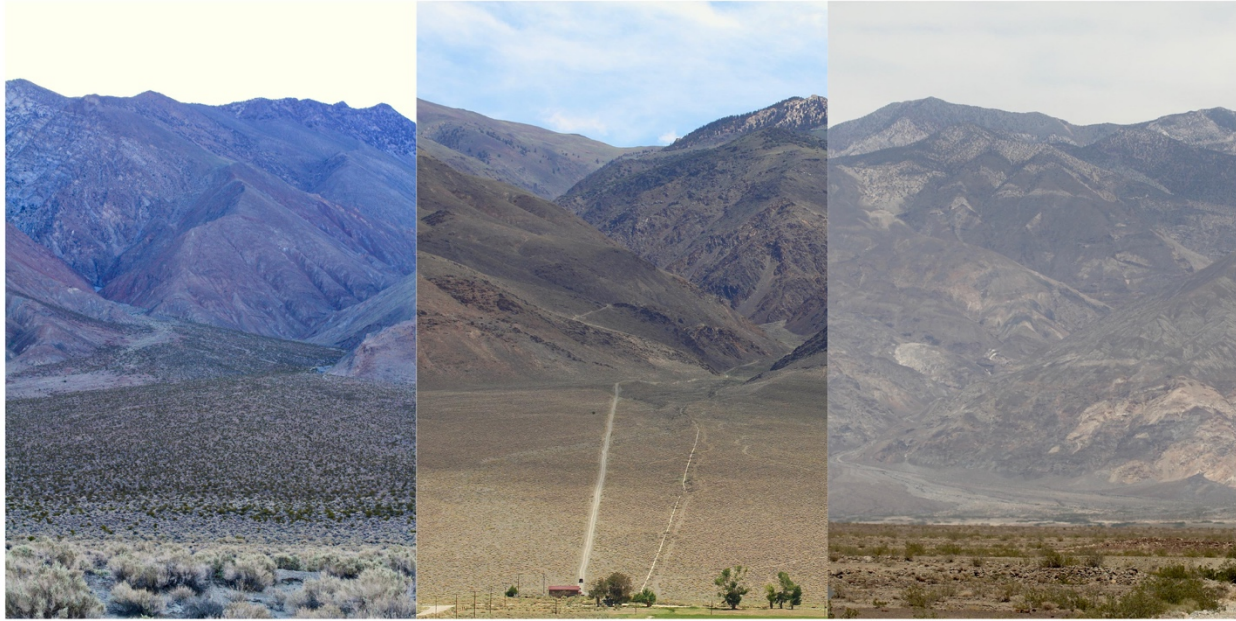

1421

1422 Figure 2. Representative landscapes for *Elgaria panamintina* and/or *Batrachoseps campi*

1423 showing the undeveloped character of the mountainous regions they inhabit. Left to right: Union

1424 Wash, Inyo Mountains; Piute Creek, White Mountains; Surprise Canyon, Panamint Mountains.

1425 Photos taken from the approximate vantage point of the nearest paved road; a high-clearance dirt

1426 access road is visible in the middle photo. Photographs by Adam G. Clause.

1427

1428



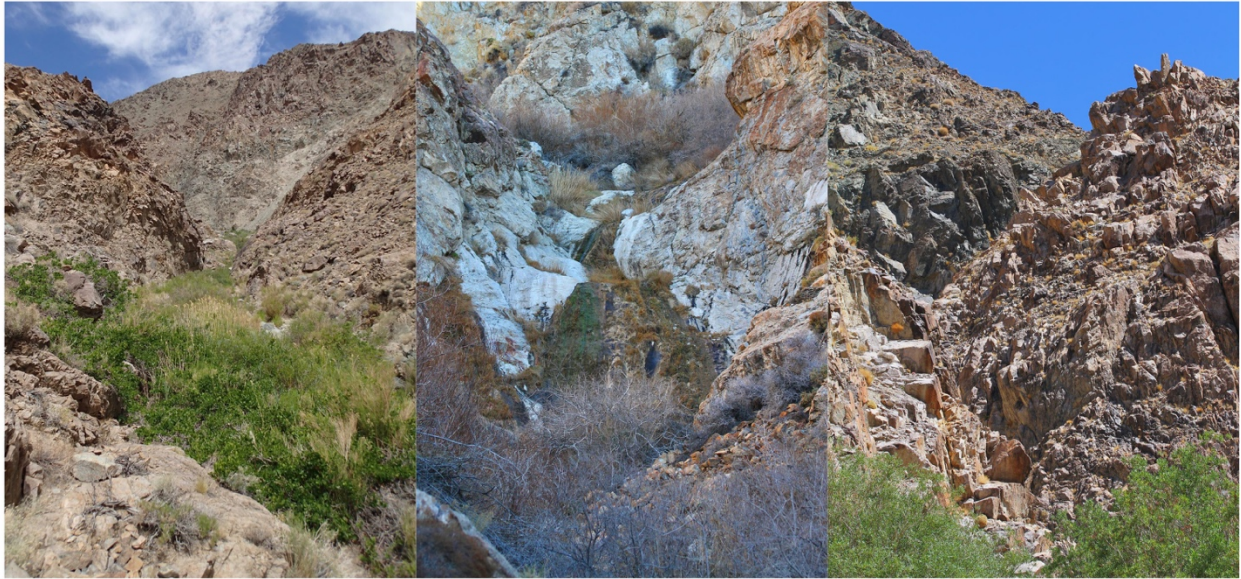

1429

1430 Figure 3. Habitat photos for *Elgaria panamintina* and/or *Batrachoseps campi* showing the  
1431 rugged, rocky terrain and bedrock waterfalls that are common in occupied canyon-bottom  
1432 microhabitat. Left to right: Water Canyon, Argus Mountains; unnamed canyon between Union  
1433 Wash and Reward Mine, Inyo Mountains; French Spring, Inyo Mountains. Photographs by  
1434 Adam G. Clause.

1435

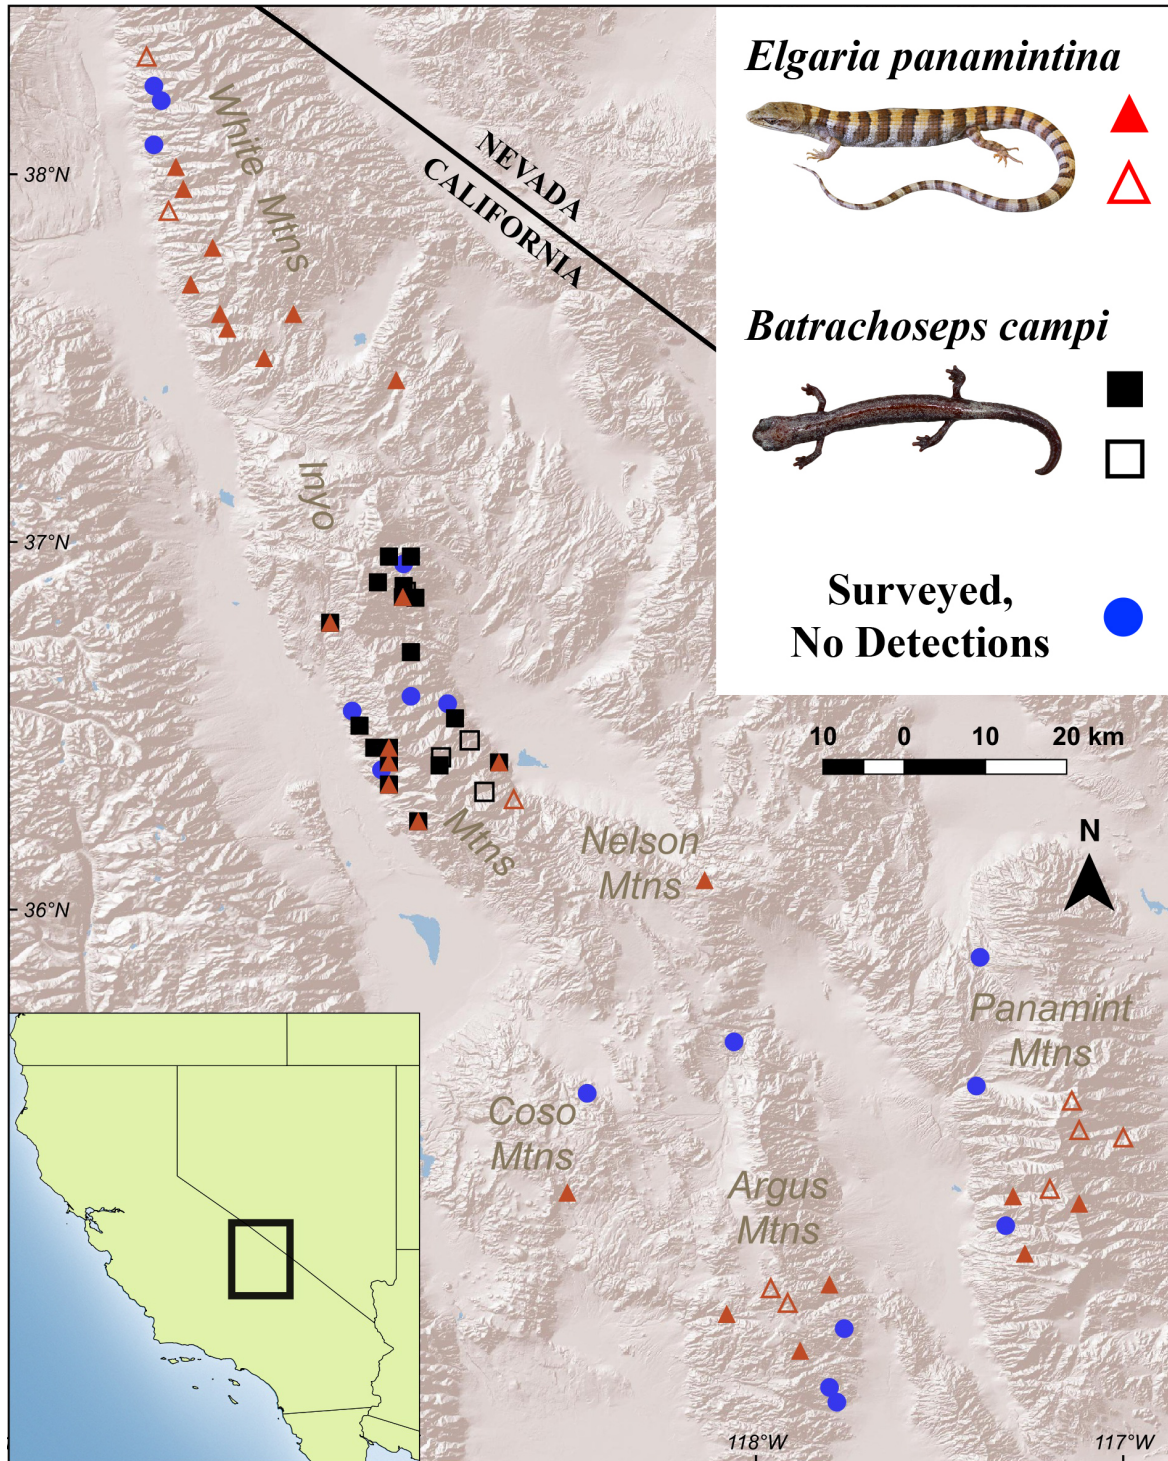

1436

1437 Figure 4. Rangelwide locality-level distribution and survey coverage for *E. panamintina* and *B.*

1438 *campi*. Solid symbols show localities surveyed for this work, hollow symbols show historically

1439 surveyed localities.

## Priority Management Actions for *Elgaria panamintina* & *Batrachoseps campi*

- ❖ Strictly regulate montane water withdrawals
- ❖ Remove non-native ungulate grazers from wildlands
- ❖ Prohibit mining-related degradation of riparian habitat
- ❖ Control *Tamarix* spp. using appropriate methods

## Research Needs for *E. panamintina* & *B. campi*

- Updated species distribution models
- GIS quantification of riparian habitat extent
  - Comprehensive field surveys
  - Conservation genomics
- Susceptibility of *B. campi* to chytridiomycosis (*Bd* & *Bsal*)

## Scholarly Publishing Standards

- Support claims with data/citation(s)
- Read and cite original source literature
- Cite references accurately and objectively
  - Cite older references with caution
- Comprehensively review relevant literature
- Prioritize peer-review outlets for novel datasets

1440

1441 Figure 5. Recommendations for management and research relating to *Elgaria panamintina* and

1442 *Batrachoseps campi*, and reminder of scholarly scientific standards.
